# Supplementary material for: Treatment patterns of patients diagnosed with major depressive disorder and suicidal ideation or attempt: a U.S. population-based study utilizing real-world data
Source: BMC Psychiatry. 2021 Dec 6;21:608. doi: 10.1186/s12888-021-03616-1 (PMC8647448; doi:10.1186/s12888-021-03616-1)
Supplement: Supplementary file 1 — Additional file 1. [file 12888_2021_3616_MOESM1_ESM.xlsx]

## Sheet: MDD
Code	Name	Class	Vocabulary
F32.0	Major depressive disorder, single episode, mild	4-char billing code	ICD10CM
F32.1	Major depressive disorder, single episode, moderate	4-char billing code	ICD10CM
F32.2	Major depressive disorder, single episode, severe without psychotic features	4-char billing code	ICD10CM
F32.3	Major depressive disorder, single episode, severe with psychotic features	4-char billing code	ICD10CM
F32.4	Major depressive disorder, single episode, in partial remission	4-char billing code	ICD10CM
F32.5	Major depressive disorder, single episode, in full remission	4-char billing code	ICD10CM
F32.81	Premenstrual dysphoric disorder	5-char billing code	ICD10CM
F32.89	Other specified depressive episodes	5-char billing code	ICD10CM
F32.9	Major depressive disorder, single episode, unspecified	4-char billing code	ICD10CM
F33.0	Major depressive disorder, recurrent, mild	4-char billing code	ICD10CM
F33.1	Major depressive disorder, recurrent, moderate	4-char billing code	ICD10CM
F33.2	Major depressive disorder, recurrent severe without psychotic features	4-char billing code	ICD10CM
F33.3	Major depressive disorder, recurrent, severe with psychotic symptoms	4-char billing code	ICD10CM
F33.40	Major depressive disorder, recurrent, in remission, unspecified	5-char billing code	ICD10CM
F33.41	Major depressive disorder, recurrent, in partial remission	5-char billing code	ICD10CM
F33.42	Major depressive disorder, recurrent, in full remission	5-char billing code	ICD10CM
F33.8	Other recurrent depressive disorders	4-char billing code	ICD10CM
F33.9	Major depressive disorder, recurrent, unspecified	4-char billing code	ICD10CM
F34.1	Dysthymic disorder	4-char billing code	ICD10CM
F53.0	Postpartum depression	4-char billing code	ICD10CM
296.20	Major depressive affective disorder, single episode, unspecified	5-dig billing code	ICD9CM
296.21	Major depressive affective disorder, single episode, mild	5-dig billing code	ICD9CM
296.22	Major depressive affective disorder, single episode, moderate	5-dig billing code	ICD9CM
296.23	Major depressive affective disorder, single episode, severe, without mention of psychotic behavior	5-dig billing code	ICD9CM
296.24	Major depressive affective disorder, single episode, severe, specified as with psychotic behavior	5-dig billing code	ICD9CM
296.25	Major depressive affective disorder, single episode, in partial or unspecified remission	5-dig billing code	ICD9CM
296.26	Major depressive affective disorder, single episode, in full remission	5-dig billing code	ICD9CM
296.30	Major depressive affective disorder, recurrent episode, unspecified	5-dig billing code	ICD9CM
296.31	Major depressive affective disorder, recurrent episode, mild	5-dig billing code	ICD9CM
296.32	Major depressive affective disorder, recurrent episode, moderate	5-dig billing code	ICD9CM
296.33	Major depressive affective disorder, recurrent episode, severe, without mention of psychotic behavior	5-dig billing code	ICD9CM
296.34	Major depressive affective disorder, recurrent episode, severe, specified as with psychotic behavior	5-dig billing code	ICD9CM
296.35	Major depressive affective disorder, recurrent episode, in partial or unspecified remission	5-dig billing code	ICD9CM
296.36	Major depressive affective disorder, recurrent episode, in full remission	5-dig billing code	ICD9CM
300.4	Dysthymic disorder	4-dig billing code	ICD9CM
311	Depressive disorder, not elsewhere classified	3-dig billing code	ICD9CM

## Sheet: Suicidal Ideation
Code	Name	Class	Vocabulary
R45.851	Suicidal ideations	6-char billing code	ICD10CM
V62.84	Suicidal ideation	5-dig billing V code	ICD9CM

## Sheet: Suicide attempt and self harm
Code	Name	Class	Vocabulary
E950.0	Suicide and self-inflicted poisoning by analgesics, antipyretics, and antirheumatics	4-dig billing E code	ICD9CM
E950.1	Suicide and self-inflicted poisoning by barbiturates	4-dig billing E code	ICD9CM
E950.2	Suicide and self-inflicted poisoning by other sedatives and hypnotics	4-dig billing E code	ICD9CM
E950.3	Suicide and self-inflicted poisoning by tranquilizers and other psychotropic agents	4-dig billing E code	ICD9CM
E950.4	Suicide and self-inflicted poisoning by other specified drugs and medicinal substances	4-dig billing E code	ICD9CM
E950.5	Suicide and self-inflicted poisoning by unspecified drug or medicinal substance	4-dig billing E code	ICD9CM
E950.6	Suicide and self-inflicted poisoning by agricultural and horticultural chemical and pharmaceutical preparations other than plant foods and fertilizers	4-dig billing E code	ICD9CM
E950.7	Suicide and self-inflicted poisoning by corrosive and caustic substances	4-dig billing E code	ICD9CM
E950.8	Suicide and self-inflicted poisoning by arsenic and its compounds	4-dig billing E code	ICD9CM
E950.9	Suicide and self-inflicted poisoning by other and unspecified solid and liquid substances	4-dig billing E code	ICD9CM
E951.0	Suicide and self-inflicted poisoning by gas distributed by pipeline	4-dig billing E code	ICD9CM
E951.1	Suicide and self-inflicted poisoning by liquefied petroleum gas distributed in mobile containers	4-dig billing E code	ICD9CM
E951.8	Suicide and self-inflicted poisoning by other utility gas	4-dig billing E code	ICD9CM
E952.0	Suicide and self-inflicted poisoning by motor vehicle exhaust gas	4-dig billing E code	ICD9CM
E952.1	Suicide and self-inflicted poisoning by other carbon monoxide	4-dig billing E code	ICD9CM
E952.8	Suicide and self-inflicted poisoning by other specified gases and vapors	4-dig billing E code	ICD9CM
E952.9	Suicide and self-inflicted poisoning by unspecified gases and vapors	4-dig billing E code	ICD9CM
E953.0	Suicide and self-inflicted injury by hanging	4-dig billing E code	ICD9CM
E953.1	Suicide and self-inflicted injury by suffocation by plastic bag	4-dig billing E code	ICD9CM
E953.8	Suicide and self-inflicted injury by other specified means	4-dig billing E code	ICD9CM
E953.9	Suicide and self-inflicted injury by unspecified means	4-dig billing E code	ICD9CM
E954	Suicide and self-inflicted injury by submersion [drowning]	3-dig billing E code	ICD9CM
E955.0	Suicide and self-inflicted injury by handgun	4-dig billing E code	ICD9CM
E955.1	Suicide and self-inflicted injury by shotgun	4-dig billing E code	ICD9CM
E955.2	Suicide and self-inflicted injury by hunting rifle	4-dig billing E code	ICD9CM
E955.3	Suicide and self-inflicted injury by military firearms	4-dig billing E code	ICD9CM
E955.4	Suicide and self-inflicted injury by other and unspecified firearm	4-dig billing E code	ICD9CM
E955.5	Suicide and self-inflicted injury by explosives	4-dig billing E code	ICD9CM
E955.6	Suicide and self-inflicted injury by air gun	4-dig billing E code	ICD9CM
E955.7	Suicide and self-inflicted injury by paintball gun	4-dig billing E code	ICD9CM
E955.9	Suicide and self-inflicted injury by firearms and explosives, unspecified	4-dig billing E code	ICD9CM
E956	Suicide and self-inflicted injury by cutting and piercing instrument	3-dig billing E code	ICD9CM
E957.0	Suicide and self-inflicted injuries by jumping from residential premises	4-dig billing E code	ICD9CM
E957.1	Suicide and self-inflicted injuries by jumping from other man-made structures	4-dig billing E code	ICD9CM
E957.2	Suicide and self-inflicted injuries by jumping from natural sites	4-dig billing E code	ICD9CM
E957.9	Suicide and self-inflicted injuries by jumping from unspecified site	4-dig billing E code	ICD9CM
E958.0	Suicide and self-inflicted injury by jumping or lying before moving object	4-dig billing E code	ICD9CM
E958.1	Suicide and self-inflicted injury by burns, fire	4-dig billing E code	ICD9CM
E958.2	Suicide and self-inflicted injury by scald	4-dig billing E code	ICD9CM
E958.3	Suicide and self-inflicted injury by extremes of cold	4-dig billing E code	ICD9CM
E958.4	Suicide and self-inflicted injury by electrocution	4-dig billing E code	ICD9CM
E958.5	Suicide and self-inflicted injury by crashing of motor vehicle	4-dig billing E code	ICD9CM
E958.6	Suicide and self-inflicted injury by crashing of aircraft	4-dig billing E code	ICD9CM
E958.7	Suicide and self-inflicted injury by caustic substances, except poisoning	4-dig billing E code	ICD9CM
E958.8	Suicide and self-inflicted injury by other specified means	4-dig billing E code	ICD9CM
E958.9	Suicide and self-inflicted injury by unspecified means	4-dig billing E code	ICD9CM
E959	Late effects of self-inflicted injury	3-dig billing E code	ICD9CM
T14.91XA	Suicide attempt, initial encounter	7-char billing code	ICD10CM
T14.91XD	Suicide attempt, subsequent encounter	7-char billing code	ICD10CM
T14.91XS	Suicide attempt, sequela	7-char billing code	ICD10CM
T36.0X2A	Poisoning by penicillins, intentional self-harm, initial encounter	7-char billing code	ICD10CM
T36.0X2D	Poisoning by penicillins, intentional self-harm, subsequent encounter	7-char billing code	ICD10CM
T36.0X2S	Poisoning by penicillins, intentional self-harm, sequela	7-char billing code	ICD10CM
T36.1X2A	Poisoning by cephalosporins and other beta-lactam antibiotics, intentional self-harm, initial encounter	7-char billing code	ICD10CM
T36.1X2D	Poisoning by cephalosporins and other beta-lactam antibiotics, intentional self-harm, subsequent encounter	7-char billing code	ICD10CM
T36.1X2S	Poisoning by cephalosporins and other beta-lactam antibiotics, intentional self-harm, sequela	7-char billing code	ICD10CM
T36.2X2A	Poisoning by chloramphenicol group, intentional self-harm, initial encounter	7-char billing code	ICD10CM
T36.2X2D	Poisoning by chloramphenicol group, intentional self-harm, subsequent encounter	7-char billing code	ICD10CM
T36.2X2S	Poisoning by chloramphenicol group, intentional self-harm, sequela	7-char billing code	ICD10CM
T36.3X2A	Poisoning by macrolides, intentional self-harm, initial encounter	7-char billing code	ICD10CM
T36.3X2D	Poisoning by macrolides, intentional self-harm, subsequent encounter	7-char billing code	ICD10CM
T36.3X2S	Poisoning by macrolides, intentional self-harm, sequela	7-char billing code	ICD10CM
T36.4X2A	Poisoning by tetracyclines, intentional self-harm, initial encounter	7-char billing code	ICD10CM
T36.4X2D	Poisoning by tetracyclines, intentional self-harm, subsequent encounter	7-char billing code	ICD10CM
T36.4X2S	Poisoning by tetracyclines, intentional self-harm, sequela	7-char billing code	ICD10CM
T36.5X2A	Poisoning by aminoglycosides, intentional self-harm, initial encounter	7-char billing code	ICD10CM
T36.5X2D	Poisoning by aminoglycosides, intentional self-harm, subsequent encounter	7-char billing code	ICD10CM
T36.5X2S	Poisoning by aminoglycosides, intentional self-harm, sequela	7-char billing code	ICD10CM
T36.6X2A	Poisoning by rifampicins, intentional self-harm, initial encounter	7-char billing code	ICD10CM
T36.6X2D	Poisoning by rifampicins, intentional self-harm, subsequent encounter	7-char billing code	ICD10CM
T36.6X2S	Poisoning by rifampicins, intentional self-harm, sequela	7-char billing code	ICD10CM
T36.7X2A	Poisoning by antifungal antibiotics, systemically used, intentional self-harm, initial encounter	7-char billing code	ICD10CM
T36.7X2D	Poisoning by antifungal antibiotics, systemically used, intentional self-harm, subsequent encounter	7-char billing code	ICD10CM
T36.7X2S	Poisoning by antifungal antibiotics, systemically used, intentional self-harm, sequela	7-char billing code	ICD10CM
T36.8X2A	Poisoning by other systemic antibiotics, intentional self-harm, initial encounter	7-char billing code	ICD10CM
T36.8X2D	Poisoning by other systemic antibiotics, intentional self-harm, subsequent encounter	7-char billing code	ICD10CM
T36.8X2S	Poisoning by other systemic antibiotics, intentional self-harm, sequela	7-char billing code	ICD10CM
T36.92XA	Poisoning by unspecified systemic antibiotic, intentional self-harm, initial encounter	7-char billing code	ICD10CM
T36.92XD	Poisoning by unspecified systemic antibiotic, intentional self-harm, subsequent encounter	7-char billing code	ICD10CM
T36.92XS	Poisoning by unspecified systemic antibiotic, intentional self-harm, sequela	7-char billing code	ICD10CM
T37.0X2A	Poisoning by sulfonamides, intentional self-harm, initial encounter	7-char billing code	ICD10CM
T37.0X2D	Poisoning by sulfonamides, intentional self-harm, subsequent encounter	7-char billing code	ICD10CM
T37.0X2S	Poisoning by sulfonamides, intentional self-harm, sequela	7-char billing code	ICD10CM
T37.1X2A	Poisoning by antimycobacterial drugs, intentional self-harm, initial encounter	7-char billing code	ICD10CM
T37.1X2D	Poisoning by antimycobacterial drugs, intentional self-harm, subsequent encounter	7-char billing code	ICD10CM
T37.1X2S	Poisoning by antimycobacterial drugs, intentional self-harm, sequela	7-char billing code	ICD10CM
T37.2X2A	Poisoning by antimalarials and drugs acting on other blood protozoa, intentional self-harm, initial encounter	7-char billing code	ICD10CM
T37.2X2D	Poisoning by antimalarials and drugs acting on other blood protozoa, intentional self-harm, subsequent encounter	7-char billing code	ICD10CM
T37.2X2S	Poisoning by antimalarials and drugs acting on other blood protozoa, intentional self-harm, sequela	7-char billing code	ICD10CM
T37.3X2A	Poisoning by other antiprotozoal drugs, intentional self-harm, initial encounter	7-char billing code	ICD10CM
T37.3X2D	Poisoning by other antiprotozoal drugs, intentional self-harm, subsequent encounter	7-char billing code	ICD10CM
T37.3X2S	Poisoning by other antiprotozoal drugs, intentional self-harm, sequela	7-char billing code	ICD10CM
T37.4X2A	Poisoning by anthelminthics, intentional self-harm, initial encounter	7-char billing code	ICD10CM
T37.4X2D	Poisoning by anthelminthics, intentional self-harm, subsequent encounter	7-char billing code	ICD10CM
T37.4X2S	Poisoning by anthelminthics, intentional self-harm, sequela	7-char billing code	ICD10CM
T37.5X2A	Poisoning by antiviral drugs, intentional self-harm, initial encounter	7-char billing code	ICD10CM
T37.5X2D	Poisoning by antiviral drugs, intentional self-harm, subsequent encounter	7-char billing code	ICD10CM
T37.5X2S	Poisoning by antiviral drugs, intentional self-harm, sequela	7-char billing code	ICD10CM
T37.8X2A	Poisoning by other specified systemic anti-infectives and antiparasitics, intentional self-harm, initial encounter	7-char billing code	ICD10CM
T37.8X2D	Poisoning by other specified systemic anti-infectives and antiparasitics, intentional self-harm, subsequent encounter	7-char billing code	ICD10CM
T37.8X2S	Poisoning by other specified systemic anti-infectives and antiparasitics, intentional self-harm, sequela	7-char billing code	ICD10CM
T37.92XA	Poisoning by unspecified systemic anti-infective and antiparasitics, intentional self-harm, initial encounter	7-char billing code	ICD10CM
T37.92XD	Poisoning by unspecified systemic anti-infective and antiparasitics, intentional self-harm, subsequent encounter	7-char billing code	ICD10CM
T37.92XS	Poisoning by unspecified systemic anti-infective and antiparasitics, intentional self-harm, sequela	7-char billing code	ICD10CM
T38.0X2A	Poisoning by glucocorticoids and synthetic analogues, intentional self-harm, initial encounter	7-char billing code	ICD10CM
T38.0X2D	Poisoning by glucocorticoids and synthetic analogues, intentional self-harm, subsequent encounter	7-char billing code	ICD10CM
T38.0X2S	Poisoning by glucocorticoids and synthetic analogues, intentional self-harm, sequela	7-char billing code	ICD10CM
T38.1X2A	Poisoning by thyroid hormones and substitutes, intentional self-harm, initial encounter	7-char billing code	ICD10CM
T38.1X2D	Poisoning by thyroid hormones and substitutes, intentional self-harm, subsequent encounter	7-char billing code	ICD10CM
T38.1X2S	Poisoning by thyroid hormones and substitutes, intentional self-harm, sequela	7-char billing code	ICD10CM
T38.2X2A	Poisoning by antithyroid drugs, intentional self-harm, initial encounter	7-char billing code	ICD10CM
T38.2X2D	Poisoning by antithyroid drugs, intentional self-harm, subsequent encounter	7-char billing code	ICD10CM
T38.2X2S	Poisoning by antithyroid drugs, intentional self-harm, sequela	7-char billing code	ICD10CM
T38.3X2A	Poisoning by insulin and oral hypoglycemic [antidiabetic] drugs, intentional self-harm, initial encounter	7-char billing code	ICD10CM
T38.3X2D	Poisoning by insulin and oral hypoglycemic [antidiabetic] drugs, intentional self-harm, subsequent encounter	7-char billing code	ICD10CM
T38.3X2S	Poisoning by insulin and oral hypoglycemic [antidiabetic] drugs, intentional self-harm, sequela	7-char billing code	ICD10CM
T38.4X2A	Poisoning by oral contraceptives, intentional self-harm, initial encounter	7-char billing code	ICD10CM
T38.4X2D	Poisoning by oral contraceptives, intentional self-harm, subsequent encounter	7-char billing code	ICD10CM
T38.4X2S	Poisoning by oral contraceptives, intentional self-harm, sequela	7-char billing code	ICD10CM
T38.5X2A	Poisoning by other estrogens and progestogens, intentional self-harm, initial encounter	7-char billing code	ICD10CM
T38.5X2D	Poisoning by other estrogens and progestogens, intentional self-harm, subsequent encounter	7-char billing code	ICD10CM
T38.5X2S	Poisoning by other estrogens and progestogens, intentional self-harm, sequela	7-char billing code	ICD10CM
T38.6X2A	Poisoning by antigonadotrophins, antiestrogens, antiandrogens, not elsewhere classified, intentional self-harm, initial encounter	7-char billing code	ICD10CM
T38.6X2D	Poisoning by antigonadotrophins, antiestrogens, antiandrogens, not elsewhere classified, intentional self-harm, subsequent encounter	7-char billing code	ICD10CM
T38.6X2S	Poisoning by antigonadotrophins, antiestrogens, antiandrogens, not elsewhere classified, intentional self-harm, sequela	7-char billing code	ICD10CM
T38.7X2A	Poisoning by androgens and anabolic congeners, intentional self-harm, initial encounter	7-char billing code	ICD10CM
T38.7X2D	Poisoning by androgens and anabolic congeners, intentional self-harm, subsequent encounter	7-char billing code	ICD10CM
T38.7X2S	Poisoning by androgens and anabolic congeners, intentional self-harm, sequela	7-char billing code	ICD10CM
T38.802A	Poisoning by unspecified hormones and synthetic substitutes, intentional self-harm, initial encounter	7-char billing code	ICD10CM
T38.802D	Poisoning by unspecified hormones and synthetic substitutes, intentional self-harm, subsequent encounter	7-char billing code	ICD10CM
T38.802S	Poisoning by unspecified hormones and synthetic substitutes, intentional self-harm, sequela	7-char billing code	ICD10CM
T38.812A	Poisoning by anterior pituitary [adenohypophyseal] hormones, intentional self-harm, initial encounter	7-char billing code	ICD10CM
T38.812D	Poisoning by anterior pituitary [adenohypophyseal] hormones, intentional self-harm, subsequent encounter	7-char billing code	ICD10CM
T38.812S	Poisoning by anterior pituitary [adenohypophyseal] hormones, intentional self-harm, sequela	7-char billing code	ICD10CM
T38.892A	Poisoning by other hormones and synthetic substitutes, intentional self-harm, initial encounter	7-char billing code	ICD10CM
T38.892D	Poisoning by other hormones and synthetic substitutes, intentional self-harm, subsequent encounter	7-char billing code	ICD10CM
T38.892S	Poisoning by other hormones and synthetic substitutes, intentional self-harm, sequela	7-char billing code	ICD10CM
T38.902A	Poisoning by unspecified hormone antagonists, intentional self-harm, initial encounter	7-char billing code	ICD10CM
T38.902D	Poisoning by unspecified hormone antagonists, intentional self-harm, subsequent encounter	7-char billing code	ICD10CM
T38.902S	Poisoning by unspecified hormone antagonists, intentional self-harm, sequela	7-char billing code	ICD10CM
T38.992A	Poisoning by other hormone antagonists, intentional self-harm, initial encounter	7-char billing code	ICD10CM
T38.992D	Poisoning by other hormone antagonists, intentional self-harm, subsequent encounter	7-char billing code	ICD10CM
T38.992S	Poisoning by other hormone antagonists, intentional self-harm, sequela	7-char billing code	ICD10CM
T39.012A	Poisoning by aspirin, intentional self-harm, initial encounter	7-char billing code	ICD10CM
T39.012D	Poisoning by aspirin, intentional self-harm, subsequent encounter	7-char billing code	ICD10CM
T39.012S	Poisoning by aspirin, intentional self-harm, sequela	7-char billing code	ICD10CM
T39.092A	Poisoning by salicylates, intentional self-harm, initial encounter	7-char billing code	ICD10CM
T39.092D	Poisoning by salicylates, intentional self-harm, subsequent encounter	7-char billing code	ICD10CM
T39.092S	Poisoning by salicylates, intentional self-harm, sequela	7-char billing code	ICD10CM
T39.1X2A	Poisoning by 4-Aminophenol derivatives, intentional self-harm, initial encounter	7-char billing code	ICD10CM
T39.1X2D	Poisoning by 4-Aminophenol derivatives, intentional self-harm, subsequent encounter	7-char billing code	ICD10CM
T39.1X2S	Poisoning by 4-Aminophenol derivatives, intentional self-harm, sequela	7-char billing code	ICD10CM
T39.2X2A	Poisoning by pyrazolone derivatives, intentional self-harm, initial encounter	7-char billing code	ICD10CM
T39.2X2D	Poisoning by pyrazolone derivatives, intentional self-harm, subsequent encounter	7-char billing code	ICD10CM
T39.2X2S	Poisoning by pyrazolone derivatives, intentional self-harm, sequela	7-char billing code	ICD10CM
T39.312A	Poisoning by propionic acid derivatives, intentional self-harm, initial encounter	7-char billing code	ICD10CM
T39.312D	Poisoning by propionic acid derivatives, intentional self-harm, subsequent encounter	7-char billing code	ICD10CM
T39.312S	Poisoning by propionic acid derivatives, intentional self-harm, sequela	7-char billing code	ICD10CM
T39.392A	Poisoning by other nonsteroidal anti-inflammatory drugs [NSAID], intentional self-harm, initial encounter	7-char billing code	ICD10CM
T39.392D	Poisoning by other nonsteroidal anti-inflammatory drugs [NSAID], intentional self-harm, subsequent encounter	7-char billing code	ICD10CM
T39.392S	Poisoning by other nonsteroidal anti-inflammatory drugs [NSAID], intentional self-harm, sequela	7-char billing code	ICD10CM
T39.4X2A	Poisoning by antirheumatics, not elsewhere classified, intentional self-harm, initial encounter	7-char billing code	ICD10CM
T39.4X2D	Poisoning by antirheumatics, not elsewhere classified, intentional self-harm, subsequent encounter	7-char billing code	ICD10CM
T39.4X2S	Poisoning by antirheumatics, not elsewhere classified, intentional self-harm, sequela	7-char billing code	ICD10CM
T39.8X2A	Poisoning by other nonopioid analgesics and antipyretics, not elsewhere classified, intentional self-harm, initial encounter	7-char billing code	ICD10CM
T39.8X2D	Poisoning by other nonopioid analgesics and antipyretics, not elsewhere classified, intentional self-harm, subsequent encounter	7-char billing code	ICD10CM
T39.8X2S	Poisoning by other nonopioid analgesics and antipyretics, not elsewhere classified, intentional self-harm, sequela	7-char billing code	ICD10CM
T39.92XA	Poisoning by unspecified nonopioid analgesic, antipyretic and antirheumatic, intentional self-harm, initial encounter	7-char billing code	ICD10CM
T39.92XD	Poisoning by unspecified nonopioid analgesic, antipyretic and antirheumatic, intentional self-harm, subsequent encounter	7-char billing code	ICD10CM
T39.92XS	Poisoning by unspecified nonopioid analgesic, antipyretic and antirheumatic, intentional self-harm, sequela	7-char billing code	ICD10CM
T40.0X2A	Poisoning by opium, intentional self-harm, initial encounter	7-char billing code	ICD10CM
T40.0X2D	Poisoning by opium, intentional self-harm, subsequent encounter	7-char billing code	ICD10CM
T40.0X2S	Poisoning by opium, intentional self-harm, sequela	7-char billing code	ICD10CM
T40.1X2A	Poisoning by heroin, intentional self-harm, initial encounter	7-char billing code	ICD10CM
T40.1X2D	Poisoning by heroin, intentional self-harm, subsequent encounter	7-char billing code	ICD10CM
T40.1X2S	Poisoning by heroin, intentional self-harm, sequela	7-char billing code	ICD10CM
T40.2X2A	Poisoning by other opioids, intentional self-harm, initial encounter	7-char billing code	ICD10CM
T40.2X2D	Poisoning by other opioids, intentional self-harm, subsequent encounter	7-char billing code	ICD10CM
T40.2X2S	Poisoning by other opioids, intentional self-harm, sequela	7-char billing code	ICD10CM
T40.3X2A	Poisoning by methadone, intentional self-harm, initial encounter	7-char billing code	ICD10CM
T40.3X2D	Poisoning by methadone, intentional self-harm, subsequent encounter	7-char billing code	ICD10CM
T40.3X2S	Poisoning by methadone, intentional self-harm, sequela	7-char billing code	ICD10CM
T40.4X2A	Poisoning by other synthetic narcotics, intentional self-harm, initial encounter	7-char billing code	ICD10CM
T40.4X2D	Poisoning by other synthetic narcotics, intentional self-harm, subsequent encounter	7-char billing code	ICD10CM
T40.4X2S	Poisoning by other synthetic narcotics, intentional self-harm, sequela	7-char billing code	ICD10CM
T40.5X2A	Poisoning by cocaine, intentional self-harm, initial encounter	7-char billing code	ICD10CM
T40.5X2D	Poisoning by cocaine, intentional self-harm, subsequent encounter	7-char billing code	ICD10CM
T40.5X2S	Poisoning by cocaine, intentional self-harm, sequela	7-char billing code	ICD10CM
T40.602A	Poisoning by unspecified narcotics, intentional self-harm, initial encounter	7-char billing code	ICD10CM
T40.602D	Poisoning by unspecified narcotics, intentional self-harm, subsequent encounter	7-char billing code	ICD10CM
T40.602S	Poisoning by unspecified narcotics, intentional self-harm, sequela	7-char billing code	ICD10CM
T40.692A	Poisoning by other narcotics, intentional self-harm, initial encounter	7-char billing code	ICD10CM
T40.692D	Poisoning by other narcotics, intentional self-harm, subsequent encounter	7-char billing code	ICD10CM
T40.692S	Poisoning by other narcotics, intentional self-harm, sequela	7-char billing code	ICD10CM
T40.7X2A	Poisoning by cannabis (derivatives), intentional self-harm, initial encounter	7-char billing code	ICD10CM
T40.7X2D	Poisoning by cannabis (derivatives), intentional self-harm, subsequent encounter	7-char billing code	ICD10CM
T40.7X2S	Poisoning by cannabis (derivatives), intentional self-harm, sequela	7-char billing code	ICD10CM
T40.8X2A	Poisoning by lysergide [LSD], intentional self-harm, initial encounter	7-char billing code	ICD10CM
T40.8X2D	Poisoning by lysergide [LSD], intentional self-harm, subsequent encounter	7-char billing code	ICD10CM
T40.8X2S	Poisoning by lysergide [LSD], intentional self-harm, sequela	7-char billing code	ICD10CM
T40.902A	Poisoning by unspecified psychodysleptics [hallucinogens], intentional self-harm, initial encounter	7-char billing code	ICD10CM
T40.902D	Poisoning by unspecified psychodysleptics [hallucinogens], intentional self-harm, subsequent encounter	7-char billing code	ICD10CM
T40.902S	Poisoning by unspecified psychodysleptics [hallucinogens], intentional self-harm, sequela	7-char billing code	ICD10CM
T40.992A	Poisoning by other psychodysleptics [hallucinogens], intentional self-harm, initial encounter	7-char billing code	ICD10CM
T40.992D	Poisoning by other psychodysleptics [hallucinogens], intentional self-harm, subsequent encounter	7-char billing code	ICD10CM
T40.992S	Poisoning by other psychodysleptics [hallucinogens], intentional self-harm, sequela	7-char billing code	ICD10CM
T41.0X2A	Poisoning by inhaled anesthetics, intentional self-harm, initial encounter	7-char billing code	ICD10CM
T41.0X2D	Poisoning by inhaled anesthetics, intentional self-harm, subsequent encounter	7-char billing code	ICD10CM
T41.0X2S	Poisoning by inhaled anesthetics, intentional self-harm, sequela	7-char billing code	ICD10CM
T41.1X2A	Poisoning by intravenous anesthetics, intentional self-harm, initial encounter	7-char billing code	ICD10CM
T41.1X2D	Poisoning by intravenous anesthetics, intentional self-harm, subsequent encounter	7-char billing code	ICD10CM
T41.1X2S	Poisoning by intravenous anesthetics, intentional self-harm, sequela	7-char billing code	ICD10CM
T41.202A	Poisoning by unspecified general anesthetics, intentional self-harm, initial encounter	7-char billing code	ICD10CM
T41.202D	Poisoning by unspecified general anesthetics, intentional self-harm, subsequent encounter	7-char billing code	ICD10CM
T41.202S	Poisoning by unspecified general anesthetics, intentional self-harm, sequela	7-char billing code	ICD10CM
T41.292A	Poisoning by other general anesthetics, intentional self-harm, initial encounter	7-char billing code	ICD10CM
T41.292D	Poisoning by other general anesthetics, intentional self-harm, subsequent encounter	7-char billing code	ICD10CM
T41.292S	Poisoning by other general anesthetics, intentional self-harm, sequela	7-char billing code	ICD10CM
T41.3X2A	Poisoning by local anesthetics, intentional self-harm, initial encounter	7-char billing code	ICD10CM
T41.3X2D	Poisoning by local anesthetics, intentional self-harm, subsequent encounter	7-char billing code	ICD10CM
T41.3X2S	Poisoning by local anesthetics, intentional self-harm, sequela	7-char billing code	ICD10CM
T41.42XA	Poisoning by unspecified anesthetic, intentional self-harm, initial encounter	7-char billing code	ICD10CM
T41.42XD	Poisoning by unspecified anesthetic, intentional self-harm, subsequent encounter	7-char billing code	ICD10CM
T41.42XS	Poisoning by unspecified anesthetic, intentional self-harm, sequela	7-char billing code	ICD10CM
T41.5X2A	Poisoning by therapeutic gases, intentional self-harm, initial encounter	7-char billing code	ICD10CM
T41.5X2D	Poisoning by therapeutic gases, intentional self-harm, subsequent encounter	7-char billing code	ICD10CM
T41.5X2S	Poisoning by therapeutic gases, intentional self-harm, sequela	7-char billing code	ICD10CM
T42.0X2A	Poisoning by hydantoin derivatives, intentional self-harm, initial encounter	7-char billing code	ICD10CM
T42.0X2D	Poisoning by hydantoin derivatives, intentional self-harm, subsequent encounter	7-char billing code	ICD10CM
T42.0X2S	Poisoning by hydantoin derivatives, intentional self-harm, sequela	7-char billing code	ICD10CM
T42.1X2A	Poisoning by iminostilbenes, intentional self-harm, initial encounter	7-char billing code	ICD10CM
T42.1X2D	Poisoning by iminostilbenes, intentional self-harm, subsequent encounter	7-char billing code	ICD10CM
T42.1X2S	Poisoning by iminostilbenes, intentional self-harm, sequela	7-char billing code	ICD10CM
T42.2X2A	Poisoning by succinimides and oxazolidinediones, intentional self-harm, initial encounter	7-char billing code	ICD10CM
T42.2X2D	Poisoning by succinimides and oxazolidinediones, intentional self-harm, subsequent encounter	7-char billing code	ICD10CM
T42.2X2S	Poisoning by succinimides and oxazolidinediones, intentional self-harm, sequela	7-char billing code	ICD10CM
T42.3X2A	Poisoning by barbiturates, intentional self-harm, initial encounter	7-char billing code	ICD10CM
T42.3X2D	Poisoning by barbiturates, intentional self-harm, subsequent encounter	7-char billing code	ICD10CM
T42.3X2S	Poisoning by barbiturates, intentional self-harm, sequela	7-char billing code	ICD10CM
T42.4X2A	Poisoning by benzodiazepines, intentional self-harm, initial encounter	7-char billing code	ICD10CM
T42.4X2D	Poisoning by benzodiazepines, intentional self-harm, subsequent encounter	7-char billing code	ICD10CM
T42.4X2S	Poisoning by benzodiazepines, intentional self-harm, sequela	7-char billing code	ICD10CM
T42.5X2A	Poisoning by mixed antiepileptics, intentional self-harm, initial encounter	7-char billing code	ICD10CM
T42.5X2D	Poisoning by mixed antiepileptics, intentional self-harm, subsequent encounter	7-char billing code	ICD10CM
T42.5X2S	Poisoning by mixed antiepileptics, intentional self-harm, sequela	7-char billing code	ICD10CM
T42.6X2A	Poisoning by other antiepileptic and sedative-hypnotic drugs, intentional self-harm, initial encounter	7-char billing code	ICD10CM
T42.6X2D	Poisoning by other antiepileptic and sedative-hypnotic drugs, intentional self-harm, subsequent encounter	7-char billing code	ICD10CM
T42.6X2S	Poisoning by other antiepileptic and sedative-hypnotic drugs, intentional self-harm, sequela	7-char billing code	ICD10CM
T42.72XA	Poisoning by unspecified antiepileptic and sedative-hypnotic drugs, intentional self-harm, initial encounter	7-char billing code	ICD10CM
T42.72XD	Poisoning by unspecified antiepileptic and sedative-hypnotic drugs, intentional self-harm, subsequent encounter	7-char billing code	ICD10CM
T42.72XS	Poisoning by unspecified antiepileptic and sedative-hypnotic drugs, intentional self-harm, sequela	7-char billing code	ICD10CM
T42.8X2A	Poisoning by antiparkinsonism drugs and other central muscle-tone depressants, intentional self-harm, initial encounter	7-char billing code	ICD10CM
T42.8X2D	Poisoning by antiparkinsonism drugs and other central muscle-tone depressants, intentional self-harm, subsequent encounter	7-char billing code	ICD10CM
T42.8X2S	Poisoning by antiparkinsonism drugs and other central muscle-tone depressants, intentional self-harm, sequela	7-char billing code	ICD10CM
T43.012A	Poisoning by tricyclic antidepressants, intentional self-harm, initial encounter	7-char billing code	ICD10CM
T43.012D	Poisoning by tricyclic antidepressants, intentional self-harm, subsequent encounter	7-char billing code	ICD10CM
T43.012S	Poisoning by tricyclic antidepressants, intentional self-harm, sequela	7-char billing code	ICD10CM
T43.022A	Poisoning by tetracyclic antidepressants, intentional self-harm, initial encounter	7-char billing code	ICD10CM
T43.022D	Poisoning by tetracyclic antidepressants, intentional self-harm, subsequent encounter	7-char billing code	ICD10CM
T43.022S	Poisoning by tetracyclic antidepressants, intentional self-harm, sequela	7-char billing code	ICD10CM
T43.1X2A	Poisoning by monoamine-oxidase-inhibitor antidepressants, intentional self-harm, initial encounter	7-char billing code	ICD10CM
T43.1X2D	Poisoning by monoamine-oxidase-inhibitor antidepressants, intentional self-harm, subsequent encounter	7-char billing code	ICD10CM
T43.1X2S	Poisoning by monoamine-oxidase-inhibitor antidepressants, intentional self-harm, sequela	7-char billing code	ICD10CM
T43.202A	Poisoning by unspecified antidepressants, intentional self-harm, initial encounter	7-char billing code	ICD10CM
T43.202D	Poisoning by unspecified antidepressants, intentional self-harm, subsequent encounter	7-char billing code	ICD10CM
T43.202S	Poisoning by unspecified antidepressants, intentional self-harm, sequela	7-char billing code	ICD10CM
T43.212A	Poisoning by selective serotonin and norepinephrine reuptake inhibitors, intentional self-harm, initial encounter	7-char billing code	ICD10CM
T43.212D	Poisoning by selective serotonin and norepinephrine reuptake inhibitors, intentional self-harm, subsequent encounter	7-char billing code	ICD10CM
T43.212S	Poisoning by selective serotonin and norepinephrine reuptake inhibitors, intentional self-harm, sequela	7-char billing code	ICD10CM
T43.222A	Poisoning by selective serotonin reuptake inhibitors, intentional self-harm, initial encounter	7-char billing code	ICD10CM
T43.222D	Poisoning by selective serotonin reuptake inhibitors, intentional self-harm, subsequent encounter	7-char billing code	ICD10CM
T43.222S	Poisoning by selective serotonin reuptake inhibitors, intentional self-harm, sequela	7-char billing code	ICD10CM
T43.292A	Poisoning by other antidepressants, intentional self-harm, initial encounter	7-char billing code	ICD10CM
T43.292D	Poisoning by other antidepressants, intentional self-harm, subsequent encounter	7-char billing code	ICD10CM
T43.292S	Poisoning by other antidepressants, intentional self-harm, sequela	7-char billing code	ICD10CM
T43.3X2A	Poisoning by phenothiazine antipsychotics and neuroleptics, intentional self-harm, initial encounter	7-char billing code	ICD10CM
T43.3X2D	Poisoning by phenothiazine antipsychotics and neuroleptics, intentional self-harm, subsequent encounter	7-char billing code	ICD10CM
T43.3X2S	Poisoning by phenothiazine antipsychotics and neuroleptics, intentional self-harm, sequela	7-char billing code	ICD10CM
T43.4X2A	Poisoning by butyrophenone and thiothixene neuroleptics, intentional self-harm, initial encounter	7-char billing code	ICD10CM
T43.4X2D	Poisoning by butyrophenone and thiothixene neuroleptics, intentional self-harm, subsequent encounter	7-char billing code	ICD10CM
T43.4X2S	Poisoning by butyrophenone and thiothixene neuroleptics, intentional self-harm, sequela	7-char billing code	ICD10CM
T43.502A	Poisoning by unspecified antipsychotics and neuroleptics, intentional self-harm, initial encounter	7-char billing code	ICD10CM
T43.502D	Poisoning by unspecified antipsychotics and neuroleptics, intentional self-harm, subsequent encounter	7-char billing code	ICD10CM
T43.502S	Poisoning by unspecified antipsychotics and neuroleptics, intentional self-harm, sequela	7-char billing code	ICD10CM
T43.592A	Poisoning by other antipsychotics and neuroleptics, intentional self-harm, initial encounter	7-char billing code	ICD10CM
T43.592D	Poisoning by other antipsychotics and neuroleptics, intentional self-harm, subsequent encounter	7-char billing code	ICD10CM
T43.592S	Poisoning by other antipsychotics and neuroleptics, intentional self-harm, sequela	7-char billing code	ICD10CM
T43.602A	Poisoning by unspecified psychostimulants, intentional self-harm, initial encounter	7-char billing code	ICD10CM
T43.602D	Poisoning by unspecified psychostimulants, intentional self-harm, subsequent encounter	7-char billing code	ICD10CM
T43.602S	Poisoning by unspecified psychostimulants, intentional self-harm, sequela	7-char billing code	ICD10CM
T43.612A	Poisoning by caffeine, intentional self-harm, initial encounter	7-char billing code	ICD10CM
T43.612D	Poisoning by caffeine, intentional self-harm, subsequent encounter	7-char billing code	ICD10CM
T43.612S	Poisoning by caffeine, intentional self-harm, sequela	7-char billing code	ICD10CM
T43.622A	Poisoning by amphetamines, intentional self-harm, initial encounter	7-char billing code	ICD10CM
T43.622D	Poisoning by amphetamines, intentional self-harm, subsequent encounter	7-char billing code	ICD10CM
T43.622S	Poisoning by amphetamines, intentional self-harm, sequela	7-char billing code	ICD10CM
T43.632A	Poisoning by methylphenidate, intentional self-harm, initial encounter	7-char billing code	ICD10CM
T43.632D	Poisoning by methylphenidate, intentional self-harm, subsequent encounter	7-char billing code	ICD10CM
T43.632S	Poisoning by methylphenidate, intentional self-harm, sequela	7-char billing code	ICD10CM
T43.642A	Poisoning by ecstasy, intentional self-harm, initial encounter	7-char billing code	ICD10CM
T43.642D	Poisoning by ecstasy, intentional self-harm, subsequent encounter	7-char billing code	ICD10CM
T43.642S	Poisoning by ecstasy, intentional self-harm, sequela	7-char billing code	ICD10CM
T43.692A	Poisoning by other psychostimulants, intentional self-harm, initial encounter	7-char billing code	ICD10CM
T43.692D	Poisoning by other psychostimulants, intentional self-harm, subsequent encounter	7-char billing code	ICD10CM
T43.692S	Poisoning by other psychostimulants, intentional self-harm, sequela	7-char billing code	ICD10CM
T43.8X2A	Poisoning by other psychotropic drugs, intentional self-harm, initial encounter	7-char billing code	ICD10CM
T43.8X2D	Poisoning by other psychotropic drugs, intentional self-harm, subsequent encounter	7-char billing code	ICD10CM
T43.8X2S	Poisoning by other psychotropic drugs, intentional self-harm, sequela	7-char billing code	ICD10CM
T43.92XA	Poisoning by unspecified psychotropic drug, intentional self-harm, initial encounter	7-char billing code	ICD10CM
T43.92XD	Poisoning by unspecified psychotropic drug, intentional self-harm, subsequent encounter	7-char billing code	ICD10CM
T43.92XS	Poisoning by unspecified psychotropic drug, intentional self-harm, sequela	7-char billing code	ICD10CM
T44.0X2A	Poisoning by anticholinesterase agents, intentional self-harm, initial encounter	7-char billing code	ICD10CM
T44.0X2D	Poisoning by anticholinesterase agents, intentional self-harm, subsequent encounter	7-char billing code	ICD10CM
T44.0X2S	Poisoning by anticholinesterase agents, intentional self-harm, sequela	7-char billing code	ICD10CM
T44.1X2A	Poisoning by other parasympathomimetics [cholinergics], intentional self-harm, initial encounter	7-char billing code	ICD10CM
T44.1X2D	Poisoning by other parasympathomimetics [cholinergics], intentional self-harm, subsequent encounter	7-char billing code	ICD10CM
T44.1X2S	Poisoning by other parasympathomimetics [cholinergics], intentional self-harm, sequela	7-char billing code	ICD10CM
T44.2X2A	Poisoning by ganglionic blocking drugs, intentional self-harm, initial encounter	7-char billing code	ICD10CM
T44.2X2D	Poisoning by ganglionic blocking drugs, intentional self-harm, subsequent encounter	7-char billing code	ICD10CM
T44.2X2S	Poisoning by ganglionic blocking drugs, intentional self-harm, sequela	7-char billing code	ICD10CM
T44.3X2A	Poisoning by other parasympatholytics [anticholinergics and antimuscarinics] and spasmolytics, intentional self-harm, initial encounter	7-char billing code	ICD10CM
T44.3X2D	Poisoning by other parasympatholytics [anticholinergics and antimuscarinics] and spasmolytics, intentional self-harm, subsequent encounter	7-char billing code	ICD10CM
T44.3X2S	Poisoning by other parasympatholytics [anticholinergics and antimuscarinics] and spasmolytics, intentional self-harm, sequela	7-char billing code	ICD10CM
T44.4X2A	Poisoning by predominantly alpha-adrenoreceptor agonists, intentional self-harm, initial encounter	7-char billing code	ICD10CM
T44.4X2D	Poisoning by predominantly alpha-adrenoreceptor agonists, intentional self-harm, subsequent encounter	7-char billing code	ICD10CM
T44.4X2S	Poisoning by predominantly alpha-adrenoreceptor agonists, intentional self-harm, sequela	7-char billing code	ICD10CM
T44.5X2A	Poisoning by predominantly beta-adrenoreceptor agonists, intentional self-harm, initial encounter	7-char billing code	ICD10CM
T44.5X2D	Poisoning by predominantly beta-adrenoreceptor agonists, intentional self-harm, subsequent encounter	7-char billing code	ICD10CM
T44.5X2S	Poisoning by predominantly beta-adrenoreceptor agonists, intentional self-harm, sequela	7-char billing code	ICD10CM
T44.6X2A	Poisoning by alpha-adrenoreceptor antagonists, intentional self-harm, initial encounter	7-char billing code	ICD10CM
T44.6X2D	Poisoning by alpha-adrenoreceptor antagonists, intentional self-harm, subsequent encounter	7-char billing code	ICD10CM
T44.6X2S	Poisoning by alpha-adrenoreceptor antagonists, intentional self-harm, sequela	7-char billing code	ICD10CM
T44.7X2A	Poisoning by beta-adrenoreceptor antagonists, intentional self-harm, initial encounter	7-char billing code	ICD10CM
T44.7X2D	Poisoning by beta-adrenoreceptor antagonists, intentional self-harm, subsequent encounter	7-char billing code	ICD10CM
T44.7X2S	Poisoning by beta-adrenoreceptor antagonists, intentional self-harm, sequela	7-char billing code	ICD10CM
T44.8X2A	Poisoning by centrally-acting and adrenergic-neuron-blocking agents, intentional self-harm, initial encounter	7-char billing code	ICD10CM
T44.8X2D	Poisoning by centrally-acting and adrenergic-neuron-blocking agents, intentional self-harm, subsequent encounter	7-char billing code	ICD10CM
T44.8X2S	Poisoning by centrally-acting and adrenergic-neuron-blocking agents, intentional self-harm, sequela	7-char billing code	ICD10CM
T44.902A	Poisoning by unspecified drugs primarily affecting the autonomic nervous system, intentional self-harm, initial encounter	7-char billing code	ICD10CM
T44.902D	Poisoning by unspecified drugs primarily affecting the autonomic nervous system, intentional self-harm, subsequent encounter	7-char billing code	ICD10CM
T44.902S	Poisoning by unspecified drugs primarily affecting the autonomic nervous system, intentional self-harm, sequela	7-char billing code	ICD10CM
T44.992A	Poisoning by other drug primarily affecting the autonomic nervous system, intentional self-harm, initial encounter	7-char billing code	ICD10CM
T44.992D	Poisoning by other drug primarily affecting the autonomic nervous system, intentional self-harm, subsequent encounter	7-char billing code	ICD10CM
T44.992S	Poisoning by other drug primarily affecting the autonomic nervous system, intentional self-harm, sequela	7-char billing code	ICD10CM
T45.0X2A	Poisoning by antiallergic and antiemetic drugs, intentional self-harm, initial encounter	7-char billing code	ICD10CM
T45.0X2D	Poisoning by antiallergic and antiemetic drugs, intentional self-harm, subsequent encounter	7-char billing code	ICD10CM
T45.0X2S	Poisoning by antiallergic and antiemetic drugs, intentional self-harm, sequela	7-char billing code	ICD10CM
T45.1X2A	Poisoning by antineoplastic and immunosuppressive drugs, intentional self-harm, initial encounter	7-char billing code	ICD10CM
T45.1X2D	Poisoning by antineoplastic and immunosuppressive drugs, intentional self-harm, subsequent encounter	7-char billing code	ICD10CM
T45.1X2S	Poisoning by antineoplastic and immunosuppressive drugs, intentional self-harm, sequela	7-char billing code	ICD10CM
T45.2X2A	Poisoning by vitamins, intentional self-harm, initial encounter	7-char billing code	ICD10CM
T45.2X2D	Poisoning by vitamins, intentional self-harm, subsequent encounter	7-char billing code	ICD10CM
T45.2X2S	Poisoning by vitamins, intentional self-harm, sequela	7-char billing code	ICD10CM
T45.3X2A	Poisoning by enzymes, intentional self-harm, initial encounter	7-char billing code	ICD10CM
T45.3X2D	Poisoning by enzymes, intentional self-harm, subsequent encounter	7-char billing code	ICD10CM
T45.3X2S	Poisoning by enzymes, intentional self-harm, sequela	7-char billing code	ICD10CM
T45.4X2A	Poisoning by iron and its compounds, intentional self-harm, initial encounter	7-char billing code	ICD10CM
T45.4X2D	Poisoning by iron and its compounds, intentional self-harm, subsequent encounter	7-char billing code	ICD10CM
T45.4X2S	Poisoning by iron and its compounds, intentional self-harm, sequela	7-char billing code	ICD10CM
T45.512A	Poisoning by anticoagulants, intentional self-harm, initial encounter	7-char billing code	ICD10CM
T45.512D	Poisoning by anticoagulants, intentional self-harm, subsequent encounter	7-char billing code	ICD10CM
T45.512S	Poisoning by anticoagulants, intentional self-harm, sequela	7-char billing code	ICD10CM
T45.522A	Poisoning by antithrombotic drugs, intentional self-harm, initial encounter	7-char billing code	ICD10CM
T45.522D	Poisoning by antithrombotic drugs, intentional self-harm, subsequent encounter	7-char billing code	ICD10CM
T45.522S	Poisoning by antithrombotic drugs, intentional self-harm, sequela	7-char billing code	ICD10CM
T45.602A	Poisoning by unspecified fibrinolysis-affecting drugs, intentional self-harm, initial encounter	7-char billing code	ICD10CM
T45.602D	Poisoning by unspecified fibrinolysis-affecting drugs, intentional self-harm, subsequent encounter	7-char billing code	ICD10CM
T45.602S	Poisoning by unspecified fibrinolysis-affecting drugs, intentional self-harm, sequela	7-char billing code	ICD10CM
T45.612A	Poisoning by thrombolytic drug, intentional self-harm, initial encounter	7-char billing code	ICD10CM
T45.612D	Poisoning by thrombolytic drug, intentional self-harm, subsequent encounter	7-char billing code	ICD10CM
T45.612S	Poisoning by thrombolytic drug, intentional self-harm, sequela	7-char billing code	ICD10CM
T45.622A	Poisoning by hemostatic drug, intentional self-harm, initial encounter	7-char billing code	ICD10CM
T45.622D	Poisoning by hemostatic drug, intentional self-harm, subsequent encounter	7-char billing code	ICD10CM
T45.622S	Poisoning by hemostatic drug, intentional self-harm, sequela	7-char billing code	ICD10CM
T45.692A	Poisoning by other fibrinolysis-affecting drugs, intentional self-harm, initial encounter	7-char billing code	ICD10CM
T45.692D	Poisoning by other fibrinolysis-affecting drugs, intentional self-harm, subsequent encounter	7-char billing code	ICD10CM
T45.692S	Poisoning by other fibrinolysis-affecting drugs, intentional self-harm, sequela	7-char billing code	ICD10CM
T45.7X2A	Poisoning by anticoagulant antagonists, vitamin K and other coagulants, intentional self-harm, initial encounter	7-char billing code	ICD10CM
T45.7X2D	Poisoning by anticoagulant antagonists, vitamin K and other coagulants, intentional self-harm, subsequent encounter	7-char billing code	ICD10CM
T45.7X2S	Poisoning by anticoagulant antagonists, vitamin K and other coagulants, intentional self-harm, sequela	7-char billing code	ICD10CM
T45.8X2A	Poisoning by other primarily systemic and hematological agents, intentional self-harm, initial encounter	7-char billing code	ICD10CM
T45.8X2D	Poisoning by other primarily systemic and hematological agents, intentional self-harm, subsequent encounter	7-char billing code	ICD10CM
T45.8X2S	Poisoning by other primarily systemic and hematological agents, intentional self-harm, sequela	7-char billing code	ICD10CM
T45.92XA	Poisoning by unspecified primarily systemic and hematological agent, intentional self-harm, initial encounter	7-char billing code	ICD10CM
T45.92XD	Poisoning by unspecified primarily systemic and hematological agent, intentional self-harm, subsequent encounter	7-char billing code	ICD10CM
T45.92XS	Poisoning by unspecified primarily systemic and hematological agent, intentional self-harm, sequela	7-char billing code	ICD10CM
T46.0X2A	Poisoning by cardiac-stimulant glycosides and drugs of similar action, intentional self-harm, initial encounter	7-char billing code	ICD10CM
T46.0X2D	Poisoning by cardiac-stimulant glycosides and drugs of similar action, intentional self-harm, subsequent encounter	7-char billing code	ICD10CM
T46.0X2S	Poisoning by cardiac-stimulant glycosides and drugs of similar action, intentional self-harm, sequela	7-char billing code	ICD10CM
T46.1X2A	Poisoning by calcium-channel blockers, intentional self-harm, initial encounter	7-char billing code	ICD10CM
T46.1X2D	Poisoning by calcium-channel blockers, intentional self-harm, subsequent encounter	7-char billing code	ICD10CM
T46.1X2S	Poisoning by calcium-channel blockers, intentional self-harm, sequela	7-char billing code	ICD10CM
T46.2X2A	Poisoning by other antidysrhythmic drugs, intentional self-harm, initial encounter	7-char billing code	ICD10CM
T46.2X2D	Poisoning by other antidysrhythmic drugs, intentional self-harm, subsequent encounter	7-char billing code	ICD10CM
T46.2X2S	Poisoning by other antidysrhythmic drugs, intentional self-harm, sequela	7-char billing code	ICD10CM
T46.3X2A	Poisoning by coronary vasodilators, intentional self-harm, initial encounter	7-char billing code	ICD10CM
T46.3X2D	Poisoning by coronary vasodilators, intentional self-harm, subsequent encounter	7-char billing code	ICD10CM
T46.3X2S	Poisoning by coronary vasodilators, intentional self-harm, sequela	7-char billing code	ICD10CM
T46.4X2A	Poisoning by angiotensin-converting-enzyme inhibitors, intentional self-harm, initial encounter	7-char billing code	ICD10CM
T46.4X2D	Poisoning by angiotensin-converting-enzyme inhibitors, intentional self-harm, subsequent encounter	7-char billing code	ICD10CM
T46.4X2S	Poisoning by angiotensin-converting-enzyme inhibitors, intentional self-harm, sequela	7-char billing code	ICD10CM
T46.5X2A	Poisoning by other antihypertensive drugs, intentional self-harm, initial encounter	7-char billing code	ICD10CM
T46.5X2D	Poisoning by other antihypertensive drugs, intentional self-harm, subsequent encounter	7-char billing code	ICD10CM
T46.5X2S	Poisoning by other antihypertensive drugs, intentional self-harm, sequela	7-char billing code	ICD10CM
T46.6X2A	Poisoning by antihyperlipidemic and antiarteriosclerotic drugs, intentional self-harm, initial encounter	7-char billing code	ICD10CM
T46.6X2D	Poisoning by antihyperlipidemic and antiarteriosclerotic drugs, intentional self-harm, subsequent encounter	7-char billing code	ICD10CM
T46.6X2S	Poisoning by antihyperlipidemic and antiarteriosclerotic drugs, intentional self-harm, sequela	7-char billing code	ICD10CM
T46.7X2A	Poisoning by peripheral vasodilators, intentional self-harm, initial encounter	7-char billing code	ICD10CM
T46.7X2D	Poisoning by peripheral vasodilators, intentional self-harm, subsequent encounter	7-char billing code	ICD10CM
T46.7X2S	Poisoning by peripheral vasodilators, intentional self-harm, sequela	7-char billing code	ICD10CM
T46.8X2A	Poisoning by antivaricose drugs, including sclerosing agents, intentional self-harm, initial encounter	7-char billing code	ICD10CM
T46.8X2D	Poisoning by antivaricose drugs, including sclerosing agents, intentional self-harm, subsequent encounter	7-char billing code	ICD10CM
T46.8X2S	Poisoning by antivaricose drugs, including sclerosing agents, intentional self-harm, sequela	7-char billing code	ICD10CM
T46.902A	Poisoning by unspecified agents primarily affecting the cardiovascular system, intentional self-harm, initial encounter	7-char billing code	ICD10CM
T46.902D	Poisoning by unspecified agents primarily affecting the cardiovascular system, intentional self-harm, subsequent encounter	7-char billing code	ICD10CM
T46.902S	Poisoning by unspecified agents primarily affecting the cardiovascular system, intentional self-harm, sequela	7-char billing code	ICD10CM
T46.992A	Poisoning by other agents primarily affecting the cardiovascular system, intentional self-harm, initial encounter	7-char billing code	ICD10CM
T46.992D	Poisoning by other agents primarily affecting the cardiovascular system, intentional self-harm, subsequent encounter	7-char billing code	ICD10CM
T46.992S	Poisoning by other agents primarily affecting the cardiovascular system, intentional self-harm, sequela	7-char billing code	ICD10CM
T47.0X2A	Poisoning by histamine H2-receptor blockers, intentional self-harm, initial encounter	7-char billing code	ICD10CM
T47.0X2D	Poisoning by histamine H2-receptor blockers, intentional self-harm, subsequent encounter	7-char billing code	ICD10CM
T47.0X2S	Poisoning by histamine H2-receptor blockers, intentional self-harm, sequela	7-char billing code	ICD10CM
T47.1X2A	Poisoning by other antacids and anti-gastric-secretion drugs, intentional self-harm, initial encounter	7-char billing code	ICD10CM
T47.1X2D	Poisoning by other antacids and anti-gastric-secretion drugs, intentional self-harm, subsequent encounter	7-char billing code	ICD10CM
T47.1X2S	Poisoning by other antacids and anti-gastric-secretion drugs, intentional self-harm, sequela	7-char billing code	ICD10CM
T47.2X2A	Poisoning by stimulant laxatives, intentional self-harm, initial encounter	7-char billing code	ICD10CM
T47.2X2D	Poisoning by stimulant laxatives, intentional self-harm, subsequent encounter	7-char billing code	ICD10CM
T47.2X2S	Poisoning by stimulant laxatives, intentional self-harm, sequela	7-char billing code	ICD10CM
T47.3X2A	Poisoning by saline and osmotic laxatives, intentional self-harm, initial encounter	7-char billing code	ICD10CM
T47.3X2D	Poisoning by saline and osmotic laxatives, intentional self-harm, subsequent encounter	7-char billing code	ICD10CM
T47.3X2S	Poisoning by saline and osmotic laxatives, intentional self-harm, sequela	7-char billing code	ICD10CM
T47.4X2A	Poisoning by other laxatives, intentional self-harm, initial encounter	7-char billing code	ICD10CM
T47.4X2D	Poisoning by other laxatives, intentional self-harm, subsequent encounter	7-char billing code	ICD10CM
T47.4X2S	Poisoning by other laxatives, intentional self-harm, sequela	7-char billing code	ICD10CM
T47.5X2A	Poisoning by digestants, intentional self-harm, initial encounter	7-char billing code	ICD10CM
T47.5X2D	Poisoning by digestants, intentional self-harm, subsequent encounter	7-char billing code	ICD10CM
T47.5X2S	Poisoning by digestants, intentional self-harm, sequela	7-char billing code	ICD10CM
T47.6X2A	Poisoning by antidiarrheal drugs, intentional self-harm, initial encounter	7-char billing code	ICD10CM
T47.6X2D	Poisoning by antidiarrheal drugs, intentional self-harm, subsequent encounter	7-char billing code	ICD10CM
T47.6X2S	Poisoning by antidiarrheal drugs, intentional self-harm, sequela	7-char billing code	ICD10CM
T47.7X2A	Poisoning by emetics, intentional self-harm, initial encounter	7-char billing code	ICD10CM
T47.7X2D	Poisoning by emetics, intentional self-harm, subsequent encounter	7-char billing code	ICD10CM
T47.7X2S	Poisoning by emetics, intentional self-harm, sequela	7-char billing code	ICD10CM
T47.8X2A	Poisoning by other agents primarily affecting gastrointestinal system, intentional self-harm, initial encounter	7-char billing code	ICD10CM
T47.8X2D	Poisoning by other agents primarily affecting gastrointestinal system, intentional self-harm, subsequent encounter	7-char billing code	ICD10CM
T47.8X2S	Poisoning by other agents primarily affecting gastrointestinal system, intentional self-harm, sequela	7-char billing code	ICD10CM
T47.92XA	Poisoning by unspecified agents primarily affecting the gastrointestinal system, intentional self-harm, initial encounter	7-char billing code	ICD10CM
T47.92XD	Poisoning by unspecified agents primarily affecting the gastrointestinal system, intentional self-harm, subsequent encounter	7-char billing code	ICD10CM
T47.92XS	Poisoning by unspecified agents primarily affecting the gastrointestinal system, intentional self-harm, sequela	7-char billing code	ICD10CM
T48.0X2A	Poisoning by oxytocic drugs, intentional self-harm, initial encounter	7-char billing code	ICD10CM
T48.0X2D	Poisoning by oxytocic drugs, intentional self-harm, subsequent encounter	7-char billing code	ICD10CM
T48.0X2S	Poisoning by oxytocic drugs, intentional self-harm, sequela	7-char billing code	ICD10CM
T48.1X2A	Poisoning by skeletal muscle relaxants [neuromuscular blocking agents], intentional self-harm, initial encounter	7-char billing code	ICD10CM
T48.1X2D	Poisoning by skeletal muscle relaxants [neuromuscular blocking agents], intentional self-harm, subsequent encounter	7-char billing code	ICD10CM
T48.1X2S	Poisoning by skeletal muscle relaxants [neuromuscular blocking agents], intentional self-harm, sequela	7-char billing code	ICD10CM
T48.202A	Poisoning by unspecified drugs acting on muscles, intentional self-harm, initial encounter	7-char billing code	ICD10CM
T48.202D	Poisoning by unspecified drugs acting on muscles, intentional self-harm, subsequent encounter	7-char billing code	ICD10CM
T48.202S	Poisoning by unspecified drugs acting on muscles, intentional self-harm, sequela	7-char billing code	ICD10CM
T48.292A	Poisoning by other drugs acting on muscles, intentional self-harm, initial encounter	7-char billing code	ICD10CM
T48.292D	Poisoning by other drugs acting on muscles, intentional self-harm, subsequent encounter	7-char billing code	ICD10CM
T48.292S	Poisoning by other drugs acting on muscles, intentional self-harm, sequela	7-char billing code	ICD10CM
T48.3X2A	Poisoning by antitussives, intentional self-harm, initial encounter	7-char billing code	ICD10CM
T48.3X2D	Poisoning by antitussives, intentional self-harm, subsequent encounter	7-char billing code	ICD10CM
T48.3X2S	Poisoning by antitussives, intentional self-harm, sequela	7-char billing code	ICD10CM
T48.4X2A	Poisoning by expectorants, intentional self-harm, initial encounter	7-char billing code	ICD10CM
T48.4X2D	Poisoning by expectorants, intentional self-harm, subsequent encounter	7-char billing code	ICD10CM
T48.4X2S	Poisoning by expectorants, intentional self-harm, sequela	7-char billing code	ICD10CM
T48.5X2A	Poisoning by other anti-common-cold drugs, intentional self-harm, initial encounter	7-char billing code	ICD10CM
T48.5X2D	Poisoning by other anti-common-cold drugs, intentional self-harm, subsequent encounter	7-char billing code	ICD10CM
T48.5X2S	Poisoning by other anti-common-cold drugs, intentional self-harm, sequela	7-char billing code	ICD10CM
T48.6X2A	Poisoning by antiasthmatics, intentional self-harm, initial encounter	7-char billing code	ICD10CM
T48.6X2D	Poisoning by antiasthmatics, intentional self-harm, subsequent encounter	7-char billing code	ICD10CM
T48.6X2S	Poisoning by antiasthmatics, intentional self-harm, sequela	7-char billing code	ICD10CM
T48.902A	Poisoning by unspecified agents primarily acting on the respiratory system, intentional self-harm, initial encounter	7-char billing code	ICD10CM
T48.902D	Poisoning by unspecified agents primarily acting on the respiratory system, intentional self-harm, subsequent encounter	7-char billing code	ICD10CM
T48.902S	Poisoning by unspecified agents primarily acting on the respiratory system, intentional self-harm, sequela	7-char billing code	ICD10CM
T48.992A	Poisoning by other agents primarily acting on the respiratory system, intentional self-harm, initial encounter	7-char billing code	ICD10CM
T48.992D	Poisoning by other agents primarily acting on the respiratory system, intentional self-harm, subsequent encounter	7-char billing code	ICD10CM
T48.992S	Poisoning by other agents primarily acting on the respiratory system, intentional self-harm, sequela	7-char billing code	ICD10CM
T49.0X2A	Poisoning by local antifungal, anti-infective and anti-inflammatory drugs, intentional self-harm, initial encounter	7-char billing code	ICD10CM
T49.0X2D	Poisoning by local antifungal, anti-infective and anti-inflammatory drugs, intentional self-harm, subsequent encounter	7-char billing code	ICD10CM
T49.0X2S	Poisoning by local antifungal, anti-infective and anti-inflammatory drugs, intentional self-harm, sequela	7-char billing code	ICD10CM
T49.1X2A	Poisoning by antipruritics, intentional self-harm, initial encounter	7-char billing code	ICD10CM
T49.1X2D	Poisoning by antipruritics, intentional self-harm, subsequent encounter	7-char billing code	ICD10CM
T49.1X2S	Poisoning by antipruritics, intentional self-harm, sequela	7-char billing code	ICD10CM
T49.2X2A	Poisoning by local astringents and local detergents, intentional self-harm, initial encounter	7-char billing code	ICD10CM
T49.2X2D	Poisoning by local astringents and local detergents, intentional self-harm, subsequent encounter	7-char billing code	ICD10CM
T49.2X2S	Poisoning by local astringents and local detergents, intentional self-harm, sequela	7-char billing code	ICD10CM
T49.3X2A	Poisoning by emollients, demulcents and protectants, intentional self-harm, initial encounter	7-char billing code	ICD10CM
T49.3X2D	Poisoning by emollients, demulcents and protectants, intentional self-harm, subsequent encounter	7-char billing code	ICD10CM
T49.3X2S	Poisoning by emollients, demulcents and protectants, intentional self-harm, sequela	7-char billing code	ICD10CM
T49.4X2A	Poisoning by keratolytics, keratoplastics, and other hair treatment drugs and preparations, intentional self-harm, initial encounter	7-char billing code	ICD10CM
T49.4X2D	Poisoning by keratolytics, keratoplastics, and other hair treatment drugs and preparations, intentional self-harm, subsequent encounter	7-char billing code	ICD10CM
T49.4X2S	Poisoning by keratolytics, keratoplastics, and other hair treatment drugs and preparations, intentional self-harm, sequela	7-char billing code	ICD10CM
T49.5X2A	Poisoning by ophthalmological drugs and preparations, intentional self-harm, initial encounter	7-char billing code	ICD10CM
T49.5X2D	Poisoning by ophthalmological drugs and preparations, intentional self-harm, subsequent encounter	7-char billing code	ICD10CM
T49.5X2S	Poisoning by ophthalmological drugs and preparations, intentional self-harm, sequela	7-char billing code	ICD10CM
T49.6X2A	Poisoning by otorhinolaryngological drugs and preparations, intentional self-harm, initial encounter	7-char billing code	ICD10CM
T49.6X2D	Poisoning by otorhinolaryngological drugs and preparations, intentional self-harm, subsequent encounter	7-char billing code	ICD10CM
T49.6X2S	Poisoning by otorhinolaryngological drugs and preparations, intentional self-harm, sequela	7-char billing code	ICD10CM
T49.7X2A	Poisoning by dental drugs, topically applied, intentional self-harm, initial encounter	7-char billing code	ICD10CM
T49.7X2D	Poisoning by dental drugs, topically applied, intentional self-harm, subsequent encounter	7-char billing code	ICD10CM
T49.7X2S	Poisoning by dental drugs, topically applied, intentional self-harm, sequela	7-char billing code	ICD10CM
T49.8X2A	Poisoning by other topical agents, intentional self-harm, initial encounter	7-char billing code	ICD10CM
T49.8X2D	Poisoning by other topical agents, intentional self-harm, subsequent encounter	7-char billing code	ICD10CM
T49.8X2S	Poisoning by other topical agents, intentional self-harm, sequela	7-char billing code	ICD10CM
T49.92XA	Poisoning by unspecified topical agent, intentional self-harm, initial encounter	7-char billing code	ICD10CM
T49.92XD	Poisoning by unspecified topical agent, intentional self-harm, subsequent encounter	7-char billing code	ICD10CM
T49.92XS	Poisoning by unspecified topical agent, intentional self-harm, sequela	7-char billing code	ICD10CM
T50.0X2A	Poisoning by mineralocorticoids and their antagonists, intentional self-harm, initial encounter	7-char billing code	ICD10CM
T50.0X2D	Poisoning by mineralocorticoids and their antagonists, intentional self-harm, subsequent encounter	7-char billing code	ICD10CM
T50.0X2S	Poisoning by mineralocorticoids and their antagonists, intentional self-harm, sequela	7-char billing code	ICD10CM
T50.1X2A	Poisoning by loop [high-ceiling] diuretics, intentional self-harm, initial encounter	7-char billing code	ICD10CM
T50.1X2D	Poisoning by loop [high-ceiling] diuretics, intentional self-harm, subsequent encounter	7-char billing code	ICD10CM
T50.1X2S	Poisoning by loop [high-ceiling] diuretics, intentional self-harm, sequela	7-char billing code	ICD10CM
T50.2X2A	Poisoning by carbonic-anhydrase inhibitors, benzothiadiazides and other diuretics, intentional self-harm, initial encounter	7-char billing code	ICD10CM
T50.2X2D	Poisoning by carbonic-anhydrase inhibitors, benzothiadiazides and other diuretics, intentional self-harm, subsequent encounter	7-char billing code	ICD10CM
T50.2X2S	Poisoning by carbonic-anhydrase inhibitors, benzothiadiazides and other diuretics, intentional self-harm, sequela	7-char billing code	ICD10CM
T50.3X2A	Poisoning by electrolytic, caloric and water-balance agents, intentional self-harm, initial encounter	7-char billing code	ICD10CM
T50.3X2D	Poisoning by electrolytic, caloric and water-balance agents, intentional self-harm, subsequent encounter	7-char billing code	ICD10CM
T50.3X2S	Poisoning by electrolytic, caloric and water-balance agents, intentional self-harm, sequela	7-char billing code	ICD10CM
T50.4X2A	Poisoning by drugs affecting uric acid metabolism, intentional self-harm, initial encounter	7-char billing code	ICD10CM
T50.4X2D	Poisoning by drugs affecting uric acid metabolism, intentional self-harm, subsequent encounter	7-char billing code	ICD10CM
T50.4X2S	Poisoning by drugs affecting uric acid metabolism, intentional self-harm, sequela	7-char billing code	ICD10CM
T50.5X2A	Poisoning by appetite depressants, intentional self-harm, initial encounter	7-char billing code	ICD10CM
T50.5X2D	Poisoning by appetite depressants, intentional self-harm, subsequent encounter	7-char billing code	ICD10CM
T50.5X2S	Poisoning by appetite depressants, intentional self-harm, sequela	7-char billing code	ICD10CM
T50.6X2A	Poisoning by antidotes and chelating agents, intentional self-harm, initial encounter	7-char billing code	ICD10CM
T50.6X2D	Poisoning by antidotes and chelating agents, intentional self-harm, subsequent encounter	7-char billing code	ICD10CM
T50.6X2S	Poisoning by antidotes and chelating agents, intentional self-harm, sequela	7-char billing code	ICD10CM
T50.7X2A	Poisoning by analeptics and opioid receptor antagonists, intentional self-harm, initial encounter	7-char billing code	ICD10CM
T50.7X2D	Poisoning by analeptics and opioid receptor antagonists, intentional self-harm, subsequent encounter	7-char billing code	ICD10CM
T50.7X2S	Poisoning by analeptics and opioid receptor antagonists, intentional self-harm, sequela	7-char billing code	ICD10CM
T50.8X2A	Poisoning by diagnostic agents, intentional self-harm, initial encounter	7-char billing code	ICD10CM
T50.8X2D	Poisoning by diagnostic agents, intentional self-harm, subsequent encounter	7-char billing code	ICD10CM
T50.8X2S	Poisoning by diagnostic agents, intentional self-harm, sequela	7-char billing code	ICD10CM
T50.902A	Poisoning by unspecified drugs, medicaments and biological substances, intentional self-harm, initial encounter	7-char billing code	ICD10CM
T50.902D	Poisoning by unspecified drugs, medicaments and biological substances, intentional self-harm, subsequent encounter	7-char billing code	ICD10CM
T50.902S	Poisoning by unspecified drugs, medicaments and biological substances, intentional self-harm, sequela	7-char billing code	ICD10CM
T50.912A	Poisoning by multiple unspecified drugs, medicaments and biological substances, intentional self-harm, initial encounter	7-char billing code	ICD10CM
T50.912D	Poisoning by multiple unspecified drugs, medicaments and biological substances, intentional self-harm, subsequent encounter	7-char billing code	ICD10CM
T50.912S	Poisoning by multiple unspecified drugs, medicaments and biological substances, intentional self-harm, sequela	7-char billing code	ICD10CM
T50.992A	Poisoning by other drugs, medicaments and biological substances, intentional self-harm, initial encounter	7-char billing code	ICD10CM
T50.992D	Poisoning by other drugs, medicaments and biological substances, intentional self-harm, subsequent encounter	7-char billing code	ICD10CM
T50.992S	Poisoning by other drugs, medicaments and biological substances, intentional self-harm, sequela	7-char billing code	ICD10CM
T50.A12A	Poisoning by pertussis vaccine, including combinations with a pertussis component, intentional self-harm, initial encounter	7-char billing code	ICD10CM
T50.A12D	Poisoning by pertussis vaccine, including combinations with a pertussis component, intentional self-harm, subsequent encounter	7-char billing code	ICD10CM
T50.A12S	Poisoning by pertussis vaccine, including combinations with a pertussis component, intentional self-harm, sequela	7-char billing code	ICD10CM
T50.A22A	Poisoning by mixed bacterial vaccines without a pertussis component, intentional self-harm, initial encounter	7-char billing code	ICD10CM
T50.A22D	Poisoning by mixed bacterial vaccines without a pertussis component, intentional self-harm, subsequent encounter	7-char billing code	ICD10CM
T50.A22S	Poisoning by mixed bacterial vaccines without a pertussis component, intentional self-harm, sequela	7-char billing code	ICD10CM
T50.A92A	Poisoning by other bacterial vaccines, intentional self-harm, initial encounter	7-char billing code	ICD10CM
T50.A92D	Poisoning by other bacterial vaccines, intentional self-harm, subsequent encounter	7-char billing code	ICD10CM
T50.A92S	Poisoning by other bacterial vaccines, intentional self-harm, sequela	7-char billing code	ICD10CM
T50.B12A	Poisoning by smallpox vaccines, intentional self-harm, initial encounter	7-char billing code	ICD10CM
T50.B12D	Poisoning by smallpox vaccines, intentional self-harm, subsequent encounter	7-char billing code	ICD10CM
T50.B12S	Poisoning by smallpox vaccines, intentional self-harm, sequela	7-char billing code	ICD10CM
T50.B92A	Poisoning by other viral vaccines, intentional self-harm, initial encounter	7-char billing code	ICD10CM
T50.B92D	Poisoning by other viral vaccines, intentional self-harm, subsequent encounter	7-char billing code	ICD10CM
T50.B92S	Poisoning by other viral vaccines, intentional self-harm, sequela	7-char billing code	ICD10CM
T50.Z12A	Poisoning by immunoglobulin, intentional self-harm, initial encounter	7-char billing code	ICD10CM
T50.Z12D	Poisoning by immunoglobulin, intentional self-harm, subsequent encounter	7-char billing code	ICD10CM
T50.Z12S	Poisoning by immunoglobulin, intentional self-harm, sequela	7-char billing code	ICD10CM
T50.Z92A	Poisoning by other vaccines and biological substances, intentional self-harm, initial encounter	7-char billing code	ICD10CM
T50.Z92D	Poisoning by other vaccines and biological substances, intentional self-harm, subsequent encounter	7-char billing code	ICD10CM
T50.Z92S	Poisoning by other vaccines and biological substances, intentional self-harm, sequela	7-char billing code	ICD10CM
T51.0X2A	Toxic effect of ethanol, intentional self-harm, initial encounter	7-char billing code	ICD10CM
T51.0X2D	Toxic effect of ethanol, intentional self-harm, subsequent encounter	7-char billing code	ICD10CM
T51.0X2S	Toxic effect of ethanol, intentional self-harm, sequela	7-char billing code	ICD10CM
T51.1X2A	Toxic effect of methanol, intentional self-harm, initial encounter	7-char billing code	ICD10CM
T51.1X2D	Toxic effect of methanol, intentional self-harm, subsequent encounter	7-char billing code	ICD10CM
T51.1X2S	Toxic effect of methanol, intentional self-harm, sequela	7-char billing code	ICD10CM
T51.2X2A	Toxic effect of 2-Propanol, intentional self-harm, initial encounter	7-char billing code	ICD10CM
T51.2X2D	Toxic effect of 2-Propanol, intentional self-harm, subsequent encounter	7-char billing code	ICD10CM
T51.2X2S	Toxic effect of 2-Propanol, intentional self-harm, sequela	7-char billing code	ICD10CM
T51.3X2A	Toxic effect of fusel oil, intentional self-harm, initial encounter	7-char billing code	ICD10CM
T51.3X2D	Toxic effect of fusel oil, intentional self-harm, subsequent encounter	7-char billing code	ICD10CM
T51.3X2S	Toxic effect of fusel oil, intentional self-harm, sequela	7-char billing code	ICD10CM
T51.8X2A	Toxic effect of other alcohols, intentional self-harm, initial encounter	7-char billing code	ICD10CM
T51.8X2D	Toxic effect of other alcohols, intentional self-harm, subsequent encounter	7-char billing code	ICD10CM
T51.8X2S	Toxic effect of other alcohols, intentional self-harm, sequela	7-char billing code	ICD10CM
T51.92XA	Toxic effect of unspecified alcohol, intentional self-harm, initial encounter	7-char billing code	ICD10CM
T51.92XD	Toxic effect of unspecified alcohol, intentional self-harm, subsequent encounter	7-char billing code	ICD10CM
T51.92XS	Toxic effect of unspecified alcohol, intentional self-harm, sequela	7-char billing code	ICD10CM
T52.0X2A	Toxic effect of petroleum products, intentional self-harm, initial encounter	7-char billing code	ICD10CM
T52.0X2D	Toxic effect of petroleum products, intentional self-harm, subsequent encounter	7-char billing code	ICD10CM
T52.0X2S	Toxic effect of petroleum products, intentional self-harm, sequela	7-char billing code	ICD10CM
T52.1X2A	Toxic effect of benzene, intentional self-harm, initial encounter	7-char billing code	ICD10CM
T52.1X2D	Toxic effect of benzene, intentional self-harm, subsequent encounter	7-char billing code	ICD10CM
T52.1X2S	Toxic effect of benzene, intentional self-harm, sequela	7-char billing code	ICD10CM
T52.2X2A	Toxic effect of homologues of benzene, intentional self-harm, initial encounter	7-char billing code	ICD10CM
T52.2X2D	Toxic effect of homologues of benzene, intentional self-harm, subsequent encounter	7-char billing code	ICD10CM
T52.2X2S	Toxic effect of homologues of benzene, intentional self-harm, sequela	7-char billing code	ICD10CM
T52.3X2A	Toxic effect of glycols, intentional self-harm, initial encounter	7-char billing code	ICD10CM
T52.3X2D	Toxic effect of glycols, intentional self-harm, subsequent encounter	7-char billing code	ICD10CM
T52.3X2S	Toxic effect of glycols, intentional self-harm, sequela	7-char billing code	ICD10CM
T52.4X2A	Toxic effect of ketones, intentional self-harm, initial encounter	7-char billing code	ICD10CM
T52.4X2D	Toxic effect of ketones, intentional self-harm, subsequent encounter	7-char billing code	ICD10CM
T52.4X2S	Toxic effect of ketones, intentional self-harm, sequela	7-char billing code	ICD10CM
T52.8X2A	Toxic effect of other organic solvents, intentional self-harm, initial encounter	7-char billing code	ICD10CM
T52.8X2D	Toxic effect of other organic solvents, intentional self-harm, subsequent encounter	7-char billing code	ICD10CM
T52.8X2S	Toxic effect of other organic solvents, intentional self-harm, sequela	7-char billing code	ICD10CM
T52.92XA	Toxic effect of unspecified organic solvent, intentional self-harm, initial encounter	7-char billing code	ICD10CM
T52.92XD	Toxic effect of unspecified organic solvent, intentional self-harm, subsequent encounter	7-char billing code	ICD10CM
T52.92XS	Toxic effect of unspecified organic solvent, intentional self-harm, sequela	7-char billing code	ICD10CM
T53.0X2A	Toxic effect of carbon tetrachloride, intentional self-harm, initial encounter	7-char billing code	ICD10CM
T53.0X2D	Toxic effect of carbon tetrachloride, intentional self-harm, subsequent encounter	7-char billing code	ICD10CM
T53.0X2S	Toxic effect of carbon tetrachloride, intentional self-harm, sequela	7-char billing code	ICD10CM
T53.1X2A	Toxic effect of chloroform, intentional self-harm, initial encounter	7-char billing code	ICD10CM
T53.1X2D	Toxic effect of chloroform, intentional self-harm, subsequent encounter	7-char billing code	ICD10CM
T53.1X2S	Toxic effect of chloroform, intentional self-harm, sequela	7-char billing code	ICD10CM
T53.2X2A	Toxic effect of trichloroethylene, intentional self-harm, initial encounter	7-char billing code	ICD10CM
T53.2X2D	Toxic effect of trichloroethylene, intentional self-harm, subsequent encounter	7-char billing code	ICD10CM
T53.2X2S	Toxic effect of trichloroethylene, intentional self-harm, sequela	7-char billing code	ICD10CM
T53.3X2A	Toxic effect of tetrachloroethylene, intentional self-harm, initial encounter	7-char billing code	ICD10CM
T53.3X2D	Toxic effect of tetrachloroethylene, intentional self-harm, subsequent encounter	7-char billing code	ICD10CM
T53.3X2S	Toxic effect of tetrachloroethylene, intentional self-harm, sequela	7-char billing code	ICD10CM
T53.4X2A	Toxic effect of dichloromethane, intentional self-harm, initial encounter	7-char billing code	ICD10CM
T53.4X2D	Toxic effect of dichloromethane, intentional self-harm, subsequent encounter	7-char billing code	ICD10CM
T53.4X2S	Toxic effect of dichloromethane, intentional self-harm, sequela	7-char billing code	ICD10CM
T53.5X2A	Toxic effect of chlorofluorocarbons, intentional self-harm, initial encounter	7-char billing code	ICD10CM
T53.5X2D	Toxic effect of chlorofluorocarbons, intentional self-harm, subsequent encounter	7-char billing code	ICD10CM
T53.5X2S	Toxic effect of chlorofluorocarbons, intentional self-harm, sequela	7-char billing code	ICD10CM
T53.6X2A	Toxic effect of other halogen derivatives of aliphatic hydrocarbons, intentional self-harm, initial encounter	7-char billing code	ICD10CM
T53.6X2D	Toxic effect of other halogen derivatives of aliphatic hydrocarbons, intentional self-harm, subsequent encounter	7-char billing code	ICD10CM
T53.6X2S	Toxic effect of other halogen derivatives of aliphatic hydrocarbons, intentional self-harm, sequela	7-char billing code	ICD10CM
T53.7X2A	Toxic effect of other halogen derivatives of aromatic hydrocarbons, intentional self-harm, initial encounter	7-char billing code	ICD10CM
T53.7X2D	Toxic effect of other halogen derivatives of aromatic hydrocarbons, intentional self-harm, subsequent encounter	7-char billing code	ICD10CM
T53.7X2S	Toxic effect of other halogen derivatives of aromatic hydrocarbons, intentional self-harm, sequela	7-char billing code	ICD10CM
T53.92XA	Toxic effect of unspecified halogen derivatives of aliphatic and aromatic hydrocarbons, intentional self-harm, initial encounter	7-char billing code	ICD10CM
T53.92XD	Toxic effect of unspecified halogen derivatives of aliphatic and aromatic hydrocarbons, intentional self-harm, subsequent encounter	7-char billing code	ICD10CM
T53.92XS	Toxic effect of unspecified halogen derivatives of aliphatic and aromatic hydrocarbons, intentional self-harm, sequela	7-char billing code	ICD10CM
T54.0X2A	Toxic effect of phenol and phenol homologues, intentional self-harm, initial encounter	7-char billing code	ICD10CM
T54.0X2D	Toxic effect of phenol and phenol homologues, intentional self-harm, subsequent encounter	7-char billing code	ICD10CM
T54.0X2S	Toxic effect of phenol and phenol homologues, intentional self-harm, sequela	7-char billing code	ICD10CM
T54.1X2A	Toxic effect of other corrosive organic compounds, intentional self-harm, initial encounter	7-char billing code	ICD10CM
T54.1X2D	Toxic effect of other corrosive organic compounds, intentional self-harm, subsequent encounter	7-char billing code	ICD10CM
T54.1X2S	Toxic effect of other corrosive organic compounds, intentional self-harm, sequela	7-char billing code	ICD10CM
T54.2X2A	Toxic effect of corrosive acids and acid-like substances, intentional self-harm, initial encounter	7-char billing code	ICD10CM
T54.2X2D	Toxic effect of corrosive acids and acid-like substances, intentional self-harm, subsequent encounter	7-char billing code	ICD10CM
T54.2X2S	Toxic effect of corrosive acids and acid-like substances, intentional self-harm, sequela	7-char billing code	ICD10CM
T54.3X2A	Toxic effect of corrosive alkalis and alkali-like substances, intentional self-harm, initial encounter	7-char billing code	ICD10CM
T54.3X2D	Toxic effect of corrosive alkalis and alkali-like substances, intentional self-harm, subsequent encounter	7-char billing code	ICD10CM
T54.3X2S	Toxic effect of corrosive alkalis and alkali-like substances, intentional self-harm, sequela	7-char billing code	ICD10CM
T54.92XA	Toxic effect of unspecified corrosive substance, intentional self-harm, initial encounter	7-char billing code	ICD10CM
T54.92XD	Toxic effect of unspecified corrosive substance, intentional self-harm, subsequent encounter	7-char billing code	ICD10CM
T54.92XS	Toxic effect of unspecified corrosive substance, intentional self-harm, sequela	7-char billing code	ICD10CM
T55.0X2A	Toxic effect of soaps, intentional self-harm, initial encounter	7-char billing code	ICD10CM
T55.0X2D	Toxic effect of soaps, intentional self-harm, subsequent encounter	7-char billing code	ICD10CM
T55.0X2S	Toxic effect of soaps, intentional self-harm, sequela	7-char billing code	ICD10CM
T55.1X2A	Toxic effect of detergents, intentional self-harm, initial encounter	7-char billing code	ICD10CM
T55.1X2D	Toxic effect of detergents, intentional self-harm, subsequent encounter	7-char billing code	ICD10CM
T55.1X2S	Toxic effect of detergents, intentional self-harm, sequela	7-char billing code	ICD10CM
T56.0X2A	Toxic effect of lead and its compounds, intentional self-harm, initial encounter	7-char billing code	ICD10CM
T56.0X2D	Toxic effect of lead and its compounds, intentional self-harm, subsequent encounter	7-char billing code	ICD10CM
T56.0X2S	Toxic effect of lead and its compounds, intentional self-harm, sequela	7-char billing code	ICD10CM
T56.1X2A	Toxic effect of mercury and its compounds, intentional self-harm, initial encounter	7-char billing code	ICD10CM
T56.1X2D	Toxic effect of mercury and its compounds, intentional self-harm, subsequent encounter	7-char billing code	ICD10CM
T56.1X2S	Toxic effect of mercury and its compounds, intentional self-harm, sequela	7-char billing code	ICD10CM
T56.2X2A	Toxic effect of chromium and its compounds, intentional self-harm, initial encounter	7-char billing code	ICD10CM
T56.2X2D	Toxic effect of chromium and its compounds, intentional self-harm, subsequent encounter	7-char billing code	ICD10CM
T56.2X2S	Toxic effect of chromium and its compounds, intentional self-harm, sequela	7-char billing code	ICD10CM
T56.3X2A	Toxic effect of cadmium and its compounds, intentional self-harm, initial encounter	7-char billing code	ICD10CM
T56.3X2D	Toxic effect of cadmium and its compounds, intentional self-harm, subsequent encounter	7-char billing code	ICD10CM
T56.3X2S	Toxic effect of cadmium and its compounds, intentional self-harm, sequela	7-char billing code	ICD10CM
T56.4X2A	Toxic effect of copper and its compounds, intentional self-harm, initial encounter	7-char billing code	ICD10CM
T56.4X2D	Toxic effect of copper and its compounds, intentional self-harm, subsequent encounter	7-char billing code	ICD10CM
T56.4X2S	Toxic effect of copper and its compounds, intentional self-harm, sequela	7-char billing code	ICD10CM
T56.5X2A	Toxic effect of zinc and its compounds, intentional self-harm, initial encounter	7-char billing code	ICD10CM
T56.5X2D	Toxic effect of zinc and its compounds, intentional self-harm, subsequent encounter	7-char billing code	ICD10CM
T56.5X2S	Toxic effect of zinc and its compounds, intentional self-harm, sequela	7-char billing code	ICD10CM
T56.6X2A	Toxic effect of tin and its compounds, intentional self-harm, initial encounter	7-char billing code	ICD10CM
T56.6X2D	Toxic effect of tin and its compounds, intentional self-harm, subsequent encounter	7-char billing code	ICD10CM
T56.6X2S	Toxic effect of tin and its compounds, intentional self-harm, sequela	7-char billing code	ICD10CM
T56.7X2A	Toxic effect of beryllium and its compounds, intentional self-harm, initial encounter	7-char billing code	ICD10CM
T56.7X2D	Toxic effect of beryllium and its compounds, intentional self-harm, subsequent encounter	7-char billing code	ICD10CM
T56.7X2S	Toxic effect of beryllium and its compounds, intentional self-harm, sequela	7-char billing code	ICD10CM
T56.812A	Toxic effect of thallium, intentional self-harm, initial encounter	7-char billing code	ICD10CM
T56.812D	Toxic effect of thallium, intentional self-harm, subsequent encounter	7-char billing code	ICD10CM
T56.812S	Toxic effect of thallium, intentional self-harm, sequela	7-char billing code	ICD10CM
T56.892A	Toxic effect of other metals, intentional self-harm, initial encounter	7-char billing code	ICD10CM
T56.892D	Toxic effect of other metals, intentional self-harm, subsequent encounter	7-char billing code	ICD10CM
T56.892S	Toxic effect of other metals, intentional self-harm, sequela	7-char billing code	ICD10CM
T56.92XA	Toxic effect of unspecified metal, intentional self-harm, initial encounter	7-char billing code	ICD10CM
T56.92XD	Toxic effect of unspecified metal, intentional self-harm, subsequent encounter	7-char billing code	ICD10CM
T56.92XS	Toxic effect of unspecified metal, intentional self-harm, sequela	7-char billing code	ICD10CM
T57.0X2A	Toxic effect of arsenic and its compounds, intentional self-harm, initial encounter	7-char billing code	ICD10CM
T57.0X2D	Toxic effect of arsenic and its compounds, intentional self-harm, subsequent encounter	7-char billing code	ICD10CM
T57.0X2S	Toxic effect of arsenic and its compounds, intentional self-harm, sequela	7-char billing code	ICD10CM
T57.1X2A	Toxic effect of phosphorus and its compounds, intentional self-harm, initial encounter	7-char billing code	ICD10CM
T57.1X2D	Toxic effect of phosphorus and its compounds, intentional self-harm, subsequent encounter	7-char billing code	ICD10CM
T57.1X2S	Toxic effect of phosphorus and its compounds, intentional self-harm, sequela	7-char billing code	ICD10CM
T57.2X2A	Toxic effect of manganese and its compounds, intentional self-harm, initial encounter	7-char billing code	ICD10CM
T57.2X2D	Toxic effect of manganese and its compounds, intentional self-harm, subsequent encounter	7-char billing code	ICD10CM
T57.2X2S	Toxic effect of manganese and its compounds, intentional self-harm, sequela	7-char billing code	ICD10CM
T57.3X2A	Toxic effect of hydrogen cyanide, intentional self-harm, initial encounter	7-char billing code	ICD10CM
T57.3X2D	Toxic effect of hydrogen cyanide, intentional self-harm, subsequent encounter	7-char billing code	ICD10CM
T57.3X2S	Toxic effect of hydrogen cyanide, intentional self-harm, sequela	7-char billing code	ICD10CM
T57.8X2A	Toxic effect of other specified inorganic substances, intentional self-harm, initial encounter	7-char billing code	ICD10CM
T57.8X2D	Toxic effect of other specified inorganic substances, intentional self-harm, subsequent encounter	7-char billing code	ICD10CM
T57.8X2S	Toxic effect of other specified inorganic substances, intentional self-harm, sequela	7-char billing code	ICD10CM
T57.92XA	Toxic effect of unspecified inorganic substance, intentional self-harm, initial encounter	7-char billing code	ICD10CM
T57.92XD	Toxic effect of unspecified inorganic substance, intentional self-harm, subsequent encounter	7-char billing code	ICD10CM
T57.92XS	Toxic effect of unspecified inorganic substance, intentional self-harm, sequela	7-char billing code	ICD10CM
T58.02XA	Toxic effect of carbon monoxide from motor vehicle exhaust, intentional self-harm, initial encounter	7-char billing code	ICD10CM
T58.02XD	Toxic effect of carbon monoxide from motor vehicle exhaust, intentional self-harm, subsequent encounter	7-char billing code	ICD10CM
T58.02XS	Toxic effect of carbon monoxide from motor vehicle exhaust, intentional self-harm, sequela	7-char billing code	ICD10CM
T58.12XA	Toxic effect of carbon monoxide from utility gas, intentional self-harm, initial encounter	7-char billing code	ICD10CM
T58.12XD	Toxic effect of carbon monoxide from utility gas, intentional self-harm, subsequent encounter	7-char billing code	ICD10CM
T58.12XS	Toxic effect of carbon monoxide from utility gas, intentional self-harm, sequela	7-char billing code	ICD10CM
T58.2X2A	Toxic effect of carbon monoxide from incomplete combustion of other domestic fuels, intentional self-harm, initial encounter	7-char billing code	ICD10CM
T58.2X2D	Toxic effect of carbon monoxide from incomplete combustion of other domestic fuels, intentional self-harm, subsequent encounter	7-char billing code	ICD10CM
T58.2X2S	Toxic effect of carbon monoxide from incomplete combustion of other domestic fuels, intentional self-harm, sequela	7-char billing code	ICD10CM
T58.8X2A	Toxic effect of carbon monoxide from other source, intentional self-harm, initial encounter	7-char billing code	ICD10CM
T58.8X2D	Toxic effect of carbon monoxide from other source, intentional self-harm, subsequent encounter	7-char billing code	ICD10CM
T58.8X2S	Toxic effect of carbon monoxide from other source, intentional self-harm, sequela	7-char billing code	ICD10CM
T58.92XA	Toxic effect of carbon monoxide from unspecified source, intentional self-harm, initial encounter	7-char billing code	ICD10CM
T58.92XD	Toxic effect of carbon monoxide from unspecified source, intentional self-harm, subsequent encounter	7-char billing code	ICD10CM
T58.92XS	Toxic effect of carbon monoxide from unspecified source, intentional self-harm, sequela	7-char billing code	ICD10CM
T59.0X2A	Toxic effect of nitrogen oxides, intentional self-harm, initial encounter	7-char billing code	ICD10CM
T59.0X2D	Toxic effect of nitrogen oxides, intentional self-harm, subsequent encounter	7-char billing code	ICD10CM
T59.0X2S	Toxic effect of nitrogen oxides, intentional self-harm, sequela	7-char billing code	ICD10CM
T59.1X2A	Toxic effect of sulfur dioxide, intentional self-harm, initial encounter	7-char billing code	ICD10CM
T59.1X2D	Toxic effect of sulfur dioxide, intentional self-harm, subsequent encounter	7-char billing code	ICD10CM
T59.1X2S	Toxic effect of sulfur dioxide, intentional self-harm, sequela	7-char billing code	ICD10CM
T59.2X2A	Toxic effect of formaldehyde, intentional self-harm, initial encounter	7-char billing code	ICD10CM
T59.2X2D	Toxic effect of formaldehyde, intentional self-harm, subsequent encounter	7-char billing code	ICD10CM
T59.2X2S	Toxic effect of formaldehyde, intentional self-harm, sequela	7-char billing code	ICD10CM
T59.3X2A	Toxic effect of lacrimogenic gas, intentional self-harm, initial encounter	7-char billing code	ICD10CM
T59.3X2D	Toxic effect of lacrimogenic gas, intentional self-harm, subsequent encounter	7-char billing code	ICD10CM
T59.3X2S	Toxic effect of lacrimogenic gas, intentional self-harm, sequela	7-char billing code	ICD10CM
T59.4X2A	Toxic effect of chlorine gas, intentional self-harm, initial encounter	7-char billing code	ICD10CM
T59.4X2D	Toxic effect of chlorine gas, intentional self-harm, subsequent encounter	7-char billing code	ICD10CM
T59.4X2S	Toxic effect of chlorine gas, intentional self-harm, sequela	7-char billing code	ICD10CM
T59.5X2A	Toxic effect of fluorine gas and hydrogen fluoride, intentional self-harm, initial encounter	7-char billing code	ICD10CM
T59.5X2D	Toxic effect of fluorine gas and hydrogen fluoride, intentional self-harm, subsequent encounter	7-char billing code	ICD10CM
T59.5X2S	Toxic effect of fluorine gas and hydrogen fluoride, intentional self-harm, sequela	7-char billing code	ICD10CM
T59.6X2A	Toxic effect of hydrogen sulfide, intentional self-harm, initial encounter	7-char billing code	ICD10CM
T59.6X2D	Toxic effect of hydrogen sulfide, intentional self-harm, subsequent encounter	7-char billing code	ICD10CM
T59.6X2S	Toxic effect of hydrogen sulfide, intentional self-harm, sequela	7-char billing code	ICD10CM
T59.7X2A	Toxic effect of carbon dioxide, intentional self-harm, initial encounter	7-char billing code	ICD10CM
T59.7X2D	Toxic effect of carbon dioxide, intentional self-harm, subsequent encounter	7-char billing code	ICD10CM
T59.7X2S	Toxic effect of carbon dioxide, intentional self-harm, sequela	7-char billing code	ICD10CM
T59.812A	Toxic effect of smoke, intentional self-harm, initial encounter	7-char billing code	ICD10CM
T59.812D	Toxic effect of smoke, intentional self-harm, subsequent encounter	7-char billing code	ICD10CM
T59.812S	Toxic effect of smoke, intentional self-harm, sequela	7-char billing code	ICD10CM
T59.892A	Toxic effect of other specified gases, fumes and vapors, intentional self-harm, initial encounter	7-char billing code	ICD10CM
T59.892D	Toxic effect of other specified gases, fumes and vapors, intentional self-harm, subsequent encounter	7-char billing code	ICD10CM
T59.892S	Toxic effect of other specified gases, fumes and vapors, intentional self-harm, sequela	7-char billing code	ICD10CM
T59.92XA	Toxic effect of unspecified gases, fumes and vapors, intentional self-harm, initial encounter	7-char billing code	ICD10CM
T59.92XD	Toxic effect of unspecified gases, fumes and vapors, intentional self-harm, subsequent encounter	7-char billing code	ICD10CM
T59.92XS	Toxic effect of unspecified gases, fumes and vapors, intentional self-harm, sequela	7-char billing code	ICD10CM
T60.0X2A	Toxic effect of organophosphate and carbamate insecticides, intentional self-harm, initial encounter	7-char billing code	ICD10CM
T60.0X2D	Toxic effect of organophosphate and carbamate insecticides, intentional self-harm, subsequent encounter	7-char billing code	ICD10CM
T60.0X2S	Toxic effect of organophosphate and carbamate insecticides, intentional self-harm, sequela	7-char billing code	ICD10CM
T60.1X2A	Toxic effect of halogenated insecticides, intentional self-harm, initial encounter	7-char billing code	ICD10CM
T60.1X2D	Toxic effect of halogenated insecticides, intentional self-harm, subsequent encounter	7-char billing code	ICD10CM
T60.1X2S	Toxic effect of halogenated insecticides, intentional self-harm, sequela	7-char billing code	ICD10CM
T60.2X2A	Toxic effect of other insecticides, intentional self-harm, initial encounter	7-char billing code	ICD10CM
T60.2X2D	Toxic effect of other insecticides, intentional self-harm, subsequent encounter	7-char billing code	ICD10CM
T60.2X2S	Toxic effect of other insecticides, intentional self-harm, sequela	7-char billing code	ICD10CM
T60.3X2A	Toxic effect of herbicides and fungicides, intentional self-harm, initial encounter	7-char billing code	ICD10CM
T60.3X2D	Toxic effect of herbicides and fungicides, intentional self-harm, subsequent encounter	7-char billing code	ICD10CM
T60.3X2S	Toxic effect of herbicides and fungicides, intentional self-harm, sequela	7-char billing code	ICD10CM
T60.4X2A	Toxic effect of rodenticides, intentional self-harm, initial encounter	7-char billing code	ICD10CM
T60.4X2D	Toxic effect of rodenticides, intentional self-harm, subsequent encounter	7-char billing code	ICD10CM
T60.4X2S	Toxic effect of rodenticides, intentional self-harm, sequela	7-char billing code	ICD10CM
T60.8X2A	Toxic effect of other pesticides, intentional self-harm, initial encounter	7-char billing code	ICD10CM
T60.8X2D	Toxic effect of other pesticides, intentional self-harm, subsequent encounter	7-char billing code	ICD10CM
T60.8X2S	Toxic effect of other pesticides, intentional self-harm, sequela	7-char billing code	ICD10CM
T60.92XA	Toxic effect of unspecified pesticide, intentional self-harm, initial encounter	7-char billing code	ICD10CM
T60.92XD	Toxic effect of unspecified pesticide, intentional self-harm, subsequent encounter	7-char billing code	ICD10CM
T60.92XS	Toxic effect of unspecified pesticide, intentional self-harm, sequela	7-char billing code	ICD10CM
T61.02XA	Ciguatera fish poisoning, intentional self-harm, initial encounter	7-char billing code	ICD10CM
T61.02XD	Ciguatera fish poisoning, intentional self-harm, subsequent encounter	7-char billing code	ICD10CM
T61.02XS	Ciguatera fish poisoning, intentional self-harm, sequela	7-char billing code	ICD10CM
T61.12XA	Scombroid fish poisoning, intentional self-harm, initial encounter	7-char billing code	ICD10CM
T61.12XD	Scombroid fish poisoning, intentional self-harm, subsequent encounter	7-char billing code	ICD10CM
T61.12XS	Scombroid fish poisoning, intentional self-harm, sequela	7-char billing code	ICD10CM
T61.772A	Other fish poisoning, intentional self-harm, initial encounter	7-char billing code	ICD10CM
T61.772D	Other fish poisoning, intentional self-harm, subsequent encounter	7-char billing code	ICD10CM
T61.772S	Other fish poisoning, intentional self-harm, sequela	7-char billing code	ICD10CM
T61.782A	Other shellfish poisoning, intentional self-harm, initial encounter	7-char billing code	ICD10CM
T61.782D	Other shellfish poisoning, intentional self-harm, subsequent encounter	7-char billing code	ICD10CM
T61.782S	Other shellfish poisoning, intentional self-harm, sequela	7-char billing code	ICD10CM
T61.8X2A	Toxic effect of other seafood, intentional self-harm, initial encounter	7-char billing code	ICD10CM
T61.8X2D	Toxic effect of other seafood, intentional self-harm, subsequent encounter	7-char billing code	ICD10CM
T61.8X2S	Toxic effect of other seafood, intentional self-harm, sequela	7-char billing code	ICD10CM
T61.92XA	Toxic effect of unspecified seafood, intentional self-harm, initial encounter	7-char billing code	ICD10CM
T61.92XD	Toxic effect of unspecified seafood, intentional self-harm, subsequent encounter	7-char billing code	ICD10CM
T61.92XS	Toxic effect of unspecified seafood, intentional self-harm, sequela	7-char billing code	ICD10CM
T62.0X2A	Toxic effect of ingested mushrooms, intentional self-harm, initial encounter	7-char billing code	ICD10CM
T62.0X2D	Toxic effect of ingested mushrooms, intentional self-harm, subsequent encounter	7-char billing code	ICD10CM
T62.0X2S	Toxic effect of ingested mushrooms, intentional self-harm, sequela	7-char billing code	ICD10CM
T62.1X2A	Toxic effect of ingested berries, intentional self-harm, initial encounter	7-char billing code	ICD10CM
T62.1X2D	Toxic effect of ingested berries, intentional self-harm, subsequent encounter	7-char billing code	ICD10CM
T62.1X2S	Toxic effect of ingested berries, intentional self-harm, sequela	7-char billing code	ICD10CM
T62.2X2A	Toxic effect of other ingested (parts of) plant(s), intentional self-harm, initial encounter	7-char billing code	ICD10CM
T62.2X2D	Toxic effect of other ingested (parts of) plant(s), intentional self-harm, subsequent encounter	7-char billing code	ICD10CM
T62.2X2S	Toxic effect of other ingested (parts of) plant(s), intentional self-harm, sequela	7-char billing code	ICD10CM
T62.8X2A	Toxic effect of other specified noxious substances eaten as food, intentional self-harm, initial encounter	7-char billing code	ICD10CM
T62.8X2D	Toxic effect of other specified noxious substances eaten as food, intentional self-harm, subsequent encounter	7-char billing code	ICD10CM
T62.8X2S	Toxic effect of other specified noxious substances eaten as food, intentional self-harm, sequela	7-char billing code	ICD10CM
T62.92XA	Toxic effect of unspecified noxious substance eaten as food, intentional self-harm, initial encounter	7-char billing code	ICD10CM
T62.92XD	Toxic effect of unspecified noxious substance eaten as food, intentional self-harm, subsequent encounter	7-char billing code	ICD10CM
T62.92XS	Toxic effect of unspecified noxious substance eaten as food, intentional self-harm, sequela	7-char billing code	ICD10CM
T63.002A	Toxic effect of unspecified snake venom, intentional self-harm, initial encounter	7-char billing code	ICD10CM
T63.002D	Toxic effect of unspecified snake venom, intentional self-harm, subsequent encounter	7-char billing code	ICD10CM
T63.002S	Toxic effect of unspecified snake venom, intentional self-harm, sequela	7-char billing code	ICD10CM
T63.012A	Toxic effect of rattlesnake venom, intentional self-harm, initial encounter	7-char billing code	ICD10CM
T63.012D	Toxic effect of rattlesnake venom, intentional self-harm, subsequent encounter	7-char billing code	ICD10CM
T63.012S	Toxic effect of rattlesnake venom, intentional self-harm, sequela	7-char billing code	ICD10CM
T63.022A	Toxic effect of coral snake venom, intentional self-harm, initial encounter	7-char billing code	ICD10CM
T63.022D	Toxic effect of coral snake venom, intentional self-harm, subsequent encounter	7-char billing code	ICD10CM
T63.022S	Toxic effect of coral snake venom, intentional self-harm, sequela	7-char billing code	ICD10CM
T63.032A	Toxic effect of taipan venom, intentional self-harm, initial encounter	7-char billing code	ICD10CM
T63.032D	Toxic effect of taipan venom, intentional self-harm, subsequent encounter	7-char billing code	ICD10CM
T63.032S	Toxic effect of taipan venom, intentional self-harm, sequela	7-char billing code	ICD10CM
T63.042A	Toxic effect of cobra venom, intentional self-harm, initial encounter	7-char billing code	ICD10CM
T63.042D	Toxic effect of cobra venom, intentional self-harm, subsequent encounter	7-char billing code	ICD10CM
T63.042S	Toxic effect of cobra venom, intentional self-harm, sequela	7-char billing code	ICD10CM
T63.062A	Toxic effect of venom of other North and South American snake, intentional self-harm, initial encounter	7-char billing code	ICD10CM
T63.062D	Toxic effect of venom of other North and South American snake, intentional self-harm, subsequent encounter	7-char billing code	ICD10CM
T63.062S	Toxic effect of venom of other North and South American snake, intentional self-harm, sequela	7-char billing code	ICD10CM
T63.072A	Toxic effect of venom of other Australian snake, intentional self-harm, initial encounter	7-char billing code	ICD10CM
T63.072D	Toxic effect of venom of other Australian snake, intentional self-harm, subsequent encounter	7-char billing code	ICD10CM
T63.072S	Toxic effect of venom of other Australian snake, intentional self-harm, sequela	7-char billing code	ICD10CM
T63.082A	Toxic effect of venom of other African and Asian snake, intentional self-harm, initial encounter	7-char billing code	ICD10CM
T63.082D	Toxic effect of venom of other African and Asian snake, intentional self-harm, subsequent encounter	7-char billing code	ICD10CM
T63.082S	Toxic effect of venom of other African and Asian snake, intentional self-harm, sequela	7-char billing code	ICD10CM
T63.092A	Toxic effect of venom of other snake, intentional self-harm, initial encounter	7-char billing code	ICD10CM
T63.092D	Toxic effect of venom of other snake, intentional self-harm, subsequent encounter	7-char billing code	ICD10CM
T63.092S	Toxic effect of venom of other snake, intentional self-harm, sequela	7-char billing code	ICD10CM
T63.112A	Toxic effect of venom of gila monster, intentional self-harm, initial encounter	7-char billing code	ICD10CM
T63.112D	Toxic effect of venom of gila monster, intentional self-harm, subsequent encounter	7-char billing code	ICD10CM
T63.112S	Toxic effect of venom of gila monster, intentional self-harm, sequela	7-char billing code	ICD10CM
T63.122A	Toxic effect of venom of other venomous lizard, intentional self-harm, initial encounter	7-char billing code	ICD10CM
T63.122D	Toxic effect of venom of other venomous lizard, intentional self-harm, subsequent encounter	7-char billing code	ICD10CM
T63.122S	Toxic effect of venom of other venomous lizard, intentional self-harm, sequela	7-char billing code	ICD10CM
T63.192A	Toxic effect of venom of other reptiles, intentional self-harm, initial encounter	7-char billing code	ICD10CM
T63.192D	Toxic effect of venom of other reptiles, intentional self-harm, subsequent encounter	7-char billing code	ICD10CM
T63.192S	Toxic effect of venom of other reptiles, intentional self-harm, sequela	7-char billing code	ICD10CM
T63.2X2A	Toxic effect of venom of scorpion, intentional self-harm, initial encounter	7-char billing code	ICD10CM
T63.2X2D	Toxic effect of venom of scorpion, intentional self-harm, subsequent encounter	7-char billing code	ICD10CM
T63.2X2S	Toxic effect of venom of scorpion, intentional self-harm, sequela	7-char billing code	ICD10CM
T63.302A	Toxic effect of unspecified spider venom, intentional self-harm, initial encounter	7-char billing code	ICD10CM
T63.302D	Toxic effect of unspecified spider venom, intentional self-harm, subsequent encounter	7-char billing code	ICD10CM
T63.302S	Toxic effect of unspecified spider venom, intentional self-harm, sequela	7-char billing code	ICD10CM
T63.312A	Toxic effect of venom of black widow spider, intentional self-harm, initial encounter	7-char billing code	ICD10CM
T63.312D	Toxic effect of venom of black widow spider, intentional self-harm, subsequent encounter	7-char billing code	ICD10CM
T63.312S	Toxic effect of venom of black widow spider, intentional self-harm, sequela	7-char billing code	ICD10CM
T63.322A	Toxic effect of venom of tarantula, intentional self-harm, initial encounter	7-char billing code	ICD10CM
T63.322D	Toxic effect of venom of tarantula, intentional self-harm, subsequent encounter	7-char billing code	ICD10CM
T63.322S	Toxic effect of venom of tarantula, intentional self-harm, sequela	7-char billing code	ICD10CM
T63.332A	Toxic effect of venom of brown recluse spider, intentional self-harm, initial encounter	7-char billing code	ICD10CM
T63.332D	Toxic effect of venom of brown recluse spider, intentional self-harm, subsequent encounter	7-char billing code	ICD10CM
T63.332S	Toxic effect of venom of brown recluse spider, intentional self-harm, sequela	7-char billing code	ICD10CM
T63.392A	Toxic effect of venom of other spider, intentional self-harm, initial encounter	7-char billing code	ICD10CM
T63.392D	Toxic effect of venom of other spider, intentional self-harm, subsequent encounter	7-char billing code	ICD10CM
T63.392S	Toxic effect of venom of other spider, intentional self-harm, sequela	7-char billing code	ICD10CM
T63.412A	Toxic effect of venom of centipedes and venomous millipedes, intentional self-harm, initial encounter	7-char billing code	ICD10CM
T63.412D	Toxic effect of venom of centipedes and venomous millipedes, intentional self-harm, subsequent encounter	7-char billing code	ICD10CM
T63.412S	Toxic effect of venom of centipedes and venomous millipedes, intentional self-harm, sequela	7-char billing code	ICD10CM
T63.422A	Toxic effect of venom of ants, intentional self-harm, initial encounter	7-char billing code	ICD10CM
T63.422D	Toxic effect of venom of ants, intentional self-harm, subsequent encounter	7-char billing code	ICD10CM
T63.422S	Toxic effect of venom of ants, intentional self-harm, sequela	7-char billing code	ICD10CM
T63.432A	Toxic effect of venom of caterpillars, intentional self-harm, initial encounter	7-char billing code	ICD10CM
T63.432D	Toxic effect of venom of caterpillars, intentional self-harm, subsequent encounter	7-char billing code	ICD10CM
T63.432S	Toxic effect of venom of caterpillars, intentional self-harm, sequela	7-char billing code	ICD10CM
T63.442A	Toxic effect of venom of bees, intentional self-harm, initial encounter	7-char billing code	ICD10CM
T63.442D	Toxic effect of venom of bees, intentional self-harm, subsequent encounter	7-char billing code	ICD10CM
T63.442S	Toxic effect of venom of bees, intentional self-harm, sequela	7-char billing code	ICD10CM
T63.452A	Toxic effect of venom of hornets, intentional self-harm, initial encounter	7-char billing code	ICD10CM
T63.452D	Toxic effect of venom of hornets, intentional self-harm, subsequent encounter	7-char billing code	ICD10CM
T63.452S	Toxic effect of venom of hornets, intentional self-harm, sequela	7-char billing code	ICD10CM
T63.462A	Toxic effect of venom of wasps, intentional self-harm, initial encounter	7-char billing code	ICD10CM
T63.462D	Toxic effect of venom of wasps, intentional self-harm, subsequent encounter	7-char billing code	ICD10CM
T63.462S	Toxic effect of venom of wasps, intentional self-harm, sequela	7-char billing code	ICD10CM
T63.482A	Toxic effect of venom of other arthropod, intentional self-harm, initial encounter	7-char billing code	ICD10CM
T63.482D	Toxic effect of venom of other arthropod, intentional self-harm, subsequent encounter	7-char billing code	ICD10CM
T63.482S	Toxic effect of venom of other arthropod, intentional self-harm, sequela	7-char billing code	ICD10CM
T63.512A	Toxic effect of contact with stingray, intentional self-harm, initial encounter	7-char billing code	ICD10CM
T63.512D	Toxic effect of contact with stingray, intentional self-harm, subsequent encounter	7-char billing code	ICD10CM
T63.512S	Toxic effect of contact with stingray, intentional self-harm, sequela	7-char billing code	ICD10CM
T63.592A	Toxic effect of contact with other venomous fish, intentional self-harm, initial encounter	7-char billing code	ICD10CM
T63.592D	Toxic effect of contact with other venomous fish, intentional self-harm, subsequent encounter	7-char billing code	ICD10CM
T63.592S	Toxic effect of contact with other venomous fish, intentional self-harm, sequela	7-char billing code	ICD10CM
T63.612A	Toxic effect of contact with Portugese Man-o-war, intentional self-harm, initial encounter	7-char billing code	ICD10CM
T63.612D	Toxic effect of contact with Portugese Man-o-war, intentional self-harm, subsequent encounter	7-char billing code	ICD10CM
T63.612S	Toxic effect of contact with Portugese Man-o-war, intentional self-harm, sequela	7-char billing code	ICD10CM
T63.622A	Toxic effect of contact with other jellyfish, intentional self-harm, initial encounter	7-char billing code	ICD10CM
T63.622D	Toxic effect of contact with other jellyfish, intentional self-harm, subsequent encounter	7-char billing code	ICD10CM
T63.622S	Toxic effect of contact with other jellyfish, intentional self-harm, sequela	7-char billing code	ICD10CM
T63.632A	Toxic effect of contact with sea anemone, intentional self-harm, initial encounter	7-char billing code	ICD10CM
T63.632D	Toxic effect of contact with sea anemone, intentional self-harm, subsequent encounter	7-char billing code	ICD10CM
T63.632S	Toxic effect of contact with sea anemone, intentional self-harm, sequela	7-char billing code	ICD10CM
T63.692A	Toxic effect of contact with other venomous marine animals, intentional self-harm, initial encounter	7-char billing code	ICD10CM
T63.692D	Toxic effect of contact with other venomous marine animals, intentional self-harm, subsequent encounter	7-char billing code	ICD10CM
T63.692S	Toxic effect of contact with other venomous marine animals, intentional self-harm, sequela	7-char billing code	ICD10CM
T63.712A	Toxic effect of contact with venomous marine plant, intentional self-harm, initial encounter	7-char billing code	ICD10CM
T63.712D	Toxic effect of contact with venomous marine plant, intentional self-harm, subsequent encounter	7-char billing code	ICD10CM
T63.712S	Toxic effect of contact with venomous marine plant, intentional self-harm, sequela	7-char billing code	ICD10CM
T63.792A	Toxic effect of contact with other venomous plant, intentional self-harm, initial encounter	7-char billing code	ICD10CM
T63.792D	Toxic effect of contact with other venomous plant, intentional self-harm, subsequent encounter	7-char billing code	ICD10CM
T63.792S	Toxic effect of contact with other venomous plant, intentional self-harm, sequela	7-char billing code	ICD10CM
T63.812A	Toxic effect of contact with venomous frog, intentional self-harm, initial encounter	7-char billing code	ICD10CM
T63.812D	Toxic effect of contact with venomous frog, intentional self-harm, subsequent encounter	7-char billing code	ICD10CM
T63.812S	Toxic effect of contact with venomous frog, intentional self-harm, sequela	7-char billing code	ICD10CM
T63.822A	Toxic effect of contact with venomous toad, intentional self-harm, initial encounter	7-char billing code	ICD10CM
T63.822D	Toxic effect of contact with venomous toad, intentional self-harm, subsequent encounter	7-char billing code	ICD10CM
T63.822S	Toxic effect of contact with venomous toad, intentional self-harm, sequela	7-char billing code	ICD10CM
T63.832A	Toxic effect of contact with other venomous amphibian, intentional self-harm, initial encounter	7-char billing code	ICD10CM
T63.832D	Toxic effect of contact with other venomous amphibian, intentional self-harm, subsequent encounter	7-char billing code	ICD10CM
T63.832S	Toxic effect of contact with other venomous amphibian, intentional self-harm, sequela	7-char billing code	ICD10CM
T63.892A	Toxic effect of contact with other venomous animals, intentional self-harm, initial encounter	7-char billing code	ICD10CM
T63.892D	Toxic effect of contact with other venomous animals, intentional self-harm, subsequent encounter	7-char billing code	ICD10CM
T63.892S	Toxic effect of contact with other venomous animals, intentional self-harm, sequela	7-char billing code	ICD10CM
T63.92XA	Toxic effect of contact with unspecified venomous animal, intentional self-harm, initial encounter	7-char billing code	ICD10CM
T63.92XD	Toxic effect of contact with unspecified venomous animal, intentional self-harm, subsequent encounter	7-char billing code	ICD10CM
T63.92XS	Toxic effect of contact with unspecified venomous animal, intentional self-harm, sequela	7-char billing code	ICD10CM
T64.02XA	Toxic effect of aflatoxin, intentional self-harm, initial encounter	7-char billing code	ICD10CM
T64.02XD	Toxic effect of aflatoxin, intentional self-harm, subsequent encounter	7-char billing code	ICD10CM
T64.02XS	Toxic effect of aflatoxin, intentional self-harm, sequela	7-char billing code	ICD10CM
T64.82XA	Toxic effect of other mycotoxin food contaminants, intentional self-harm, initial encounter	7-char billing code	ICD10CM
T64.82XD	Toxic effect of other mycotoxin food contaminants, intentional self-harm, subsequent encounter	7-char billing code	ICD10CM
T64.82XS	Toxic effect of other mycotoxin food contaminants, intentional self-harm, sequela	7-char billing code	ICD10CM
T65.0X2A	Toxic effect of cyanides, intentional self-harm, initial encounter	7-char billing code	ICD10CM
T65.0X2D	Toxic effect of cyanides, intentional self-harm, subsequent encounter	7-char billing code	ICD10CM
T65.0X2S	Toxic effect of cyanides, intentional self-harm, sequela	7-char billing code	ICD10CM
T65.1X2A	Toxic effect of strychnine and its salts, intentional self-harm, initial encounter	7-char billing code	ICD10CM
T65.1X2D	Toxic effect of strychnine and its salts, intentional self-harm, subsequent encounter	7-char billing code	ICD10CM
T65.1X2S	Toxic effect of strychnine and its salts, intentional self-harm, sequela	7-char billing code	ICD10CM
T65.212A	Toxic effect of chewing tobacco, intentional self-harm, initial encounter	7-char billing code	ICD10CM
T65.212D	Toxic effect of chewing tobacco, intentional self-harm, subsequent encounter	7-char billing code	ICD10CM
T65.212S	Toxic effect of chewing tobacco, intentional self-harm, sequela	7-char billing code	ICD10CM
T65.222A	Toxic effect of tobacco cigarettes, intentional self-harm, initial encounter	7-char billing code	ICD10CM
T65.222D	Toxic effect of tobacco cigarettes, intentional self-harm, subsequent encounter	7-char billing code	ICD10CM
T65.222S	Toxic effect of tobacco cigarettes, intentional self-harm, sequela	7-char billing code	ICD10CM
T65.292A	Toxic effect of other tobacco and nicotine, intentional self-harm, initial encounter	7-char billing code	ICD10CM
T65.292D	Toxic effect of other tobacco and nicotine, intentional self-harm, subsequent encounter	7-char billing code	ICD10CM
T65.292S	Toxic effect of other tobacco and nicotine, intentional self-harm, sequela	7-char billing code	ICD10CM
T65.3X2A	Toxic effect of nitroderivatives and aminoderivatives of benzene and its homologues, intentional self-harm, initial encounter	7-char billing code	ICD10CM
T65.3X2D	Toxic effect of nitroderivatives and aminoderivatives of benzene and its homologues, intentional self-harm, subsequent encounter	7-char billing code	ICD10CM
T65.3X2S	Toxic effect of nitroderivatives and aminoderivatives of benzene and its homologues, intentional self-harm, sequela	7-char billing code	ICD10CM
T65.4X2A	Toxic effect of carbon disulfide, intentional self-harm, initial encounter	7-char billing code	ICD10CM
T65.4X2D	Toxic effect of carbon disulfide, intentional self-harm, subsequent encounter	7-char billing code	ICD10CM
T65.4X2S	Toxic effect of carbon disulfide, intentional self-harm, sequela	7-char billing code	ICD10CM
T65.5X2A	Toxic effect of nitroglycerin and other nitric acids and esters, intentional self-harm, initial encounter	7-char billing code	ICD10CM
T65.5X2D	Toxic effect of nitroglycerin and other nitric acids and esters, intentional self-harm, subsequent encounter	7-char billing code	ICD10CM
T65.5X2S	Toxic effect of nitroglycerin and other nitric acids and esters, intentional self-harm, sequela	7-char billing code	ICD10CM
T65.6X2A	Toxic effect of paints and dyes, not elsewhere classified, intentional self-harm, initial encounter	7-char billing code	ICD10CM
T65.6X2D	Toxic effect of paints and dyes, not elsewhere classified, intentional self-harm, subsequent encounter	7-char billing code	ICD10CM
T65.6X2S	Toxic effect of paints and dyes, not elsewhere classified, intentional self-harm, sequela	7-char billing code	ICD10CM
T65.812A	Toxic effect of latex, intentional self-harm, initial encounter	7-char billing code	ICD10CM
T65.812D	Toxic effect of latex, intentional self-harm, subsequent encounter	7-char billing code	ICD10CM
T65.812S	Toxic effect of latex, intentional self-harm, sequela	7-char billing code	ICD10CM
T65.822A	Toxic effect of harmful algae and algae toxins, intentional self-harm, initial encounter	7-char billing code	ICD10CM
T65.822D	Toxic effect of harmful algae and algae toxins, intentional self-harm, subsequent encounter	7-char billing code	ICD10CM
T65.822S	Toxic effect of harmful algae and algae toxins, intentional self-harm, sequela	7-char billing code	ICD10CM
T65.832A	Toxic effect of fiberglass, intentional self-harm, initial encounter	7-char billing code	ICD10CM
T65.832D	Toxic effect of fiberglass, intentional self-harm, subsequent encounter	7-char billing code	ICD10CM
T65.832S	Toxic effect of fiberglass, intentional self-harm, sequela	7-char billing code	ICD10CM
T65.892A	Toxic effect of other specified substances, intentional self-harm, initial encounter	7-char billing code	ICD10CM
T65.892D	Toxic effect of other specified substances, intentional self-harm, subsequent encounter	7-char billing code	ICD10CM
T65.892S	Toxic effect of other specified substances, intentional self-harm, sequela	7-char billing code	ICD10CM
T65.92XA	Toxic effect of unspecified substance, intentional self-harm, initial encounter	7-char billing code	ICD10CM
T65.92XD	Toxic effect of unspecified substance, intentional self-harm, subsequent encounter	7-char billing code	ICD10CM
T65.92XS	Toxic effect of unspecified substance, intentional self-harm, sequela	7-char billing code	ICD10CM
T71.112A	Asphyxiation due to smothering under pillow, intentional self-harm, initial encounter	7-char billing code	ICD10CM
T71.112D	Asphyxiation due to smothering under pillow, intentional self-harm, subsequent encounter	7-char billing code	ICD10CM
T71.112S	Asphyxiation due to smothering under pillow, intentional self-harm, sequela	7-char billing code	ICD10CM
T71.122A	Asphyxiation due to plastic bag, intentional self-harm, initial encounter	7-char billing code	ICD10CM
T71.122D	Asphyxiation due to plastic bag, intentional self-harm, subsequent encounter	7-char billing code	ICD10CM
T71.122S	Asphyxiation due to plastic bag, intentional self-harm, sequela	7-char billing code	ICD10CM
T71.132A	Asphyxiation due to being trapped in bed linens, intentional self-harm, initial encounter	7-char billing code	ICD10CM
T71.132D	Asphyxiation due to being trapped in bed linens, intentional self-harm, subsequent encounter	7-char billing code	ICD10CM
T71.132S	Asphyxiation due to being trapped in bed linens, intentional self-harm, sequela	7-char billing code	ICD10CM
T71.152A	Asphyxiation due to smothering in furniture, intentional self-harm, initial encounter	7-char billing code	ICD10CM
T71.152D	Asphyxiation due to smothering in furniture, intentional self-harm, subsequent encounter	7-char billing code	ICD10CM
T71.152S	Asphyxiation due to smothering in furniture, intentional self-harm, sequela	7-char billing code	ICD10CM
T71.162A	Asphyxiation due to hanging, intentional self-harm, initial encounter	7-char billing code	ICD10CM
T71.162D	Asphyxiation due to hanging, intentional self-harm, subsequent encounter	7-char billing code	ICD10CM
T71.162S	Asphyxiation due to hanging, intentional self-harm, sequela	7-char billing code	ICD10CM
T71.192A	Asphyxiation due to mechanical threat to breathing due to other causes, intentional self-harm, initial encounter	7-char billing code	ICD10CM
T71.192D	Asphyxiation due to mechanical threat to breathing due to other causes, intentional self-harm, subsequent encounter	7-char billing code	ICD10CM
T71.192S	Asphyxiation due to mechanical threat to breathing due to other causes, intentional self-harm, sequela	7-char billing code	ICD10CM
T71.222A	Asphyxiation due to being trapped in a car trunk, intentional self-harm, initial encounter	7-char billing code	ICD10CM
T71.222D	Asphyxiation due to being trapped in a car trunk, intentional self-harm, subsequent encounter	7-char billing code	ICD10CM
T71.222S	Asphyxiation due to being trapped in a car trunk, intentional self-harm, sequela	7-char billing code	ICD10CM
T71.232A	Asphyxiation due to being trapped in a (discarded) refrigerator, intentional self-harm, initial encounter	7-char billing code	ICD10CM
T71.232D	Asphyxiation due to being trapped in a (discarded) refrigerator, intentional self-harm, subsequent encounter	7-char billing code	ICD10CM
T71.232S	Asphyxiation due to being trapped in a (discarded) refrigerator, intentional self-harm, sequela	7-char billing code	ICD10CM
X71.0XXA	Intentional self-harm by drowning and submersion while in bathtub, initial encounter	7-char billing code	ICD10CM
X71.0XXD	Intentional self-harm by drowning and submersion while in bathtub, subsequent encounter	7-char billing code	ICD10CM
X71.0XXS	Intentional self-harm by drowning and submersion while in bathtub, sequela	7-char billing code	ICD10CM
X71.1XXA	Intentional self-harm by drowning and submersion while in swimming pool, initial encounter	7-char billing code	ICD10CM
X71.1XXD	Intentional self-harm by drowning and submersion while in swimming pool, subsequent encounter	7-char billing code	ICD10CM
X71.1XXS	Intentional self-harm by drowning and submersion while in swimming pool, sequela	7-char billing code	ICD10CM
X71.2XXA	Intentional self-harm by drowning and submersion after jump into swimming pool, initial encounter	7-char billing code	ICD10CM
X71.2XXD	Intentional self-harm by drowning and submersion after jump into swimming pool, subsequent encounter	7-char billing code	ICD10CM
X71.2XXS	Intentional self-harm by drowning and submersion after jump into swimming pool, sequela	7-char billing code	ICD10CM
X71.3XXA	Intentional self-harm by drowning and submersion in natural water, initial encounter	7-char billing code	ICD10CM
X71.3XXD	Intentional self-harm by drowning and submersion in natural water, subsequent encounter	7-char billing code	ICD10CM
X71.3XXS	Intentional self-harm by drowning and submersion in natural water, sequela	7-char billing code	ICD10CM
X71.8XXA	Other intentional self-harm by drowning and submersion, initial encounter	7-char billing code	ICD10CM
X71.8XXD	Other intentional self-harm by drowning and submersion, subsequent encounter	7-char billing code	ICD10CM
X71.8XXS	Other intentional self-harm by drowning and submersion, sequela	7-char billing code	ICD10CM
X71.9XXA	Intentional self-harm by drowning and submersion, unspecified, initial encounter	7-char billing code	ICD10CM
X71.9XXD	Intentional self-harm by drowning and submersion, unspecified, subsequent encounter	7-char billing code	ICD10CM
X71.9XXS	Intentional self-harm by drowning and submersion, unspecified, sequela	7-char billing code	ICD10CM
X72.XXXA	Intentional self-harm by handgun discharge, initial encounter	7-char billing code	ICD10CM
X72.XXXD	Intentional self-harm by handgun discharge, subsequent encounter	7-char billing code	ICD10CM
X72.XXXS	Intentional self-harm by handgun discharge, sequela	7-char billing code	ICD10CM
X73.0XXA	Intentional self-harm by shotgun discharge, initial encounter	7-char billing code	ICD10CM
X73.0XXD	Intentional self-harm by shotgun discharge, subsequent encounter	7-char billing code	ICD10CM
X73.0XXS	Intentional self-harm by shotgun discharge, sequela	7-char billing code	ICD10CM
X73.1XXA	Intentional self-harm by hunting rifle discharge, initial encounter	7-char billing code	ICD10CM
X73.1XXD	Intentional self-harm by hunting rifle discharge, subsequent encounter	7-char billing code	ICD10CM
X73.1XXS	Intentional self-harm by hunting rifle discharge, sequela	7-char billing code	ICD10CM
X73.2XXA	Intentional self-harm by machine gun discharge, initial encounter	7-char billing code	ICD10CM
X73.2XXD	Intentional self-harm by machine gun discharge, subsequent encounter	7-char billing code	ICD10CM
X73.2XXS	Intentional self-harm by machine gun discharge, sequela	7-char billing code	ICD10CM
X73.8XXA	Intentional self-harm by other larger firearm discharge, initial encounter	7-char billing code	ICD10CM
X73.8XXD	Intentional self-harm by other larger firearm discharge, subsequent encounter	7-char billing code	ICD10CM
X73.8XXS	Intentional self-harm by other larger firearm discharge, sequela	7-char billing code	ICD10CM
X73.9XXA	Intentional self-harm by unspecified larger firearm discharge, initial encounter	7-char billing code	ICD10CM
X73.9XXD	Intentional self-harm by unspecified larger firearm discharge, subsequent encounter	7-char billing code	ICD10CM
X73.9XXS	Intentional self-harm by unspecified larger firearm discharge, sequela	7-char billing code	ICD10CM
X74.01XA	Intentional self-harm by airgun, initial encounter	7-char billing code	ICD10CM
X74.01XD	Intentional self-harm by airgun, subsequent encounter	7-char billing code	ICD10CM
X74.01XS	Intentional self-harm by airgun, sequela	7-char billing code	ICD10CM
X74.02XA	Intentional self-harm by paintball gun, initial encounter	7-char billing code	ICD10CM
X74.02XD	Intentional self-harm by paintball gun, subsequent encounter	7-char billing code	ICD10CM
X74.02XS	Intentional self-harm by paintball gun, sequela	7-char billing code	ICD10CM
X74.09XA	Intentional self-harm by other gas, air or spring-operated gun, initial encounter	7-char billing code	ICD10CM
X74.09XD	Intentional self-harm by other gas, air or spring-operated gun, subsequent encounter	7-char billing code	ICD10CM
X74.09XS	Intentional self-harm by other gas, air or spring-operated gun, sequela	7-char billing code	ICD10CM
X74.8XXA	Intentional self-harm by other firearm discharge, initial encounter	7-char billing code	ICD10CM
X74.8XXD	Intentional self-harm by other firearm discharge, subsequent encounter	7-char billing code	ICD10CM
X74.8XXS	Intentional self-harm by other firearm discharge, sequela	7-char billing code	ICD10CM
X74.9XXA	Intentional self-harm by unspecified firearm discharge, initial encounter	7-char billing code	ICD10CM
X74.9XXD	Intentional self-harm by unspecified firearm discharge, subsequent encounter	7-char billing code	ICD10CM
X74.9XXS	Intentional self-harm by unspecified firearm discharge, sequela	7-char billing code	ICD10CM
X75.XXXA	Intentional self-harm by explosive material, initial encounter	7-char billing code	ICD10CM
X75.XXXD	Intentional self-harm by explosive material, subsequent encounter	7-char billing code	ICD10CM
X75.XXXS	Intentional self-harm by explosive material, sequela	7-char billing code	ICD10CM
X76.XXXA	Intentional self-harm by smoke, fire and flames, initial encounter	7-char billing code	ICD10CM
X76.XXXD	Intentional self-harm by smoke, fire and flames, subsequent encounter	7-char billing code	ICD10CM
X76.XXXS	Intentional self-harm by smoke, fire and flames, sequela	7-char billing code	ICD10CM
X77.0XXA	Intentional self-harm by steam or hot vapors, initial encounter	7-char billing code	ICD10CM
X77.0XXD	Intentional self-harm by steam or hot vapors, subsequent encounter	7-char billing code	ICD10CM
X77.0XXS	Intentional self-harm by steam or hot vapors, sequela	7-char billing code	ICD10CM
X77.1XXA	Intentional self-harm by hot tap water, initial encounter	7-char billing code	ICD10CM
X77.1XXD	Intentional self-harm by hot tap water, subsequent encounter	7-char billing code	ICD10CM
X77.1XXS	Intentional self-harm by hot tap water, sequela	7-char billing code	ICD10CM
X77.2XXA	Intentional self-harm by other hot fluids, initial encounter	7-char billing code	ICD10CM
X77.2XXD	Intentional self-harm by other hot fluids, subsequent encounter	7-char billing code	ICD10CM
X77.2XXS	Intentional self-harm by other hot fluids, sequela	7-char billing code	ICD10CM
X77.3XXA	Intentional self-harm by hot household appliances, initial encounter	7-char billing code	ICD10CM
X77.3XXD	Intentional self-harm by hot household appliances, subsequent encounter	7-char billing code	ICD10CM
X77.3XXS	Intentional self-harm by hot household appliances, sequela	7-char billing code	ICD10CM
X77.8XXA	Intentional self-harm by other hot objects, initial encounter	7-char billing code	ICD10CM
X77.8XXD	Intentional self-harm by other hot objects, subsequent encounter	7-char billing code	ICD10CM
X77.8XXS	Intentional self-harm by other hot objects, sequela	7-char billing code	ICD10CM
X77.9XXA	Intentional self-harm by unspecified hot objects, initial encounter	7-char billing code	ICD10CM
X77.9XXD	Intentional self-harm by unspecified hot objects, subsequent encounter	7-char billing code	ICD10CM
X77.9XXS	Intentional self-harm by unspecified hot objects, sequela	7-char billing code	ICD10CM
X78.0XXA	Intentional self-harm by sharp glass, initial encounter	7-char billing code	ICD10CM
X78.0XXD	Intentional self-harm by sharp glass, subsequent encounter	7-char billing code	ICD10CM
X78.0XXS	Intentional self-harm by sharp glass, sequela	7-char billing code	ICD10CM
X78.1XXA	Intentional self-harm by knife, initial encounter	7-char billing code	ICD10CM
X78.1XXD	Intentional self-harm by knife, subsequent encounter	7-char billing code	ICD10CM
X78.1XXS	Intentional self-harm by knife, sequela	7-char billing code	ICD10CM
X78.2XXA	Intentional self-harm by sword or dagger, initial encounter	7-char billing code	ICD10CM
X78.2XXD	Intentional self-harm by sword or dagger, subsequent encounter	7-char billing code	ICD10CM
X78.2XXS	Intentional self-harm by sword or dagger, sequela	7-char billing code	ICD10CM
X78.8XXA	Intentional self-harm by other sharp object, initial encounter	7-char billing code	ICD10CM
X78.8XXD	Intentional self-harm by other sharp object, subsequent encounter	7-char billing code	ICD10CM
X78.8XXS	Intentional self-harm by other sharp object, sequela	7-char billing code	ICD10CM
X78.9XXA	Intentional self-harm by unspecified sharp object, initial encounter	7-char billing code	ICD10CM
X78.9XXD	Intentional self-harm by unspecified sharp object, subsequent encounter	7-char billing code	ICD10CM
X78.9XXS	Intentional self-harm by unspecified sharp object, sequela	7-char billing code	ICD10CM
X79.XXXA	Intentional self-harm by blunt object, initial encounter	7-char billing code	ICD10CM
X79.XXXD	Intentional self-harm by blunt object, subsequent encounter	7-char billing code	ICD10CM
X79.XXXS	Intentional self-harm by blunt object, sequela	7-char billing code	ICD10CM
X80.XXXA	Intentional self-harm by jumping from a high place, initial encounter	7-char billing code	ICD10CM
X80.XXXD	Intentional self-harm by jumping from a high place, subsequent encounter	7-char billing code	ICD10CM
X80.XXXS	Intentional self-harm by jumping from a high place, sequela	7-char billing code	ICD10CM
X81.0XXA	Intentional self-harm by jumping or lying in front of motor vehicle, initial encounter	7-char billing code	ICD10CM
X81.0XXD	Intentional self-harm by jumping or lying in front of motor vehicle, subsequent encounter	7-char billing code	ICD10CM
X81.0XXS	Intentional self-harm by jumping or lying in front of motor vehicle, sequela	7-char billing code	ICD10CM
X81.1XXA	Intentional self-harm by jumping or lying in front of (subway) train, initial encounter	7-char billing code	ICD10CM
X81.1XXD	Intentional self-harm by jumping or lying in front of (subway) train, subsequent encounter	7-char billing code	ICD10CM
X81.1XXS	Intentional self-harm by jumping or lying in front of (subway) train, sequela	7-char billing code	ICD10CM
X81.8XXA	Intentional self-harm by jumping or lying in front of other moving object, initial encounter	7-char billing code	ICD10CM
X81.8XXD	Intentional self-harm by jumping or lying in front of other moving object, subsequent encounter	7-char billing code	ICD10CM
X81.8XXS	Intentional self-harm by jumping or lying in front of other moving object, sequela	7-char billing code	ICD10CM
X82.0XXA	Intentional collision of motor vehicle with other motor vehicle, initial encounter	7-char billing code	ICD10CM
X82.0XXD	Intentional collision of motor vehicle with other motor vehicle, subsequent encounter	7-char billing code	ICD10CM
X82.0XXS	Intentional collision of motor vehicle with other motor vehicle, sequela	7-char billing code	ICD10CM
X82.1XXA	Intentional collision of motor vehicle with train, initial encounter	7-char billing code	ICD10CM
X82.1XXD	Intentional collision of motor vehicle with train, subsequent encounter	7-char billing code	ICD10CM
X82.1XXS	Intentional collision of motor vehicle with train, sequela	7-char billing code	ICD10CM
X82.2XXA	Intentional collision of motor vehicle with tree, initial encounter	7-char billing code	ICD10CM
X82.2XXD	Intentional collision of motor vehicle with tree, subsequent encounter	7-char billing code	ICD10CM
X82.2XXS	Intentional collision of motor vehicle with tree, sequela	7-char billing code	ICD10CM
X82.8XXA	Other intentional self-harm by crashing of motor vehicle, initial encounter	7-char billing code	ICD10CM
X82.8XXD	Other intentional self-harm by crashing of motor vehicle, subsequent encounter	7-char billing code	ICD10CM
X82.8XXS	Other intentional self-harm by crashing of motor vehicle, sequela	7-char billing code	ICD10CM
X83.0XXA	Intentional self-harm by crashing of aircraft, initial encounter	7-char billing code	ICD10CM
X83.0XXD	Intentional self-harm by crashing of aircraft, subsequent encounter	7-char billing code	ICD10CM
X83.0XXS	Intentional self-harm by crashing of aircraft, sequela	7-char billing code	ICD10CM
X83.1XXA	Intentional self-harm by electrocution, initial encounter	7-char billing code	ICD10CM
X83.1XXD	Intentional self-harm by electrocution, subsequent encounter	7-char billing code	ICD10CM
X83.1XXS	Intentional self-harm by electrocution, sequela	7-char billing code	ICD10CM
X83.2XXA	Intentional self-harm by exposure to extremes of cold, initial encounter	7-char billing code	ICD10CM
X83.2XXD	Intentional self-harm by exposure to extremes of cold, subsequent encounter	7-char billing code	ICD10CM
X83.2XXS	Intentional self-harm by exposure to extremes of cold, sequela	7-char billing code	ICD10CM
X83.8XXA	Intentional self-harm by other specified means, initial encounter	7-char billing code	ICD10CM
X83.8XXD	Intentional self-harm by other specified means, subsequent encounter	7-char billing code	ICD10CM
X83.8XXS	Intentional self-harm by other specified means, sequela	7-char billing code	ICD10CM
