# Supplementary material for: Treatment patterns of patients diagnosed with major depressive disorder and suicidal ideation or attempt: a U.S. population-based study utilizing real-world data
Source: BMC Psychiatry. 2021 Dec 6;21:608. doi: 10.1186/s12888-021-03616-1 (PMC8647448; doi:10.1186/s12888-021-03616-1)
Supplement: Supplementary file 2 — Additional file 2. [file 12888_2021_3616_MOESM2_ESM.xlsx]

## Sheet: ECT
Code	Name	Vocabulary
4066F	Electroconvulsive therapy (ECT) provided (MDD)	CPT4
4067F	Patient referral for electroconvulsive therapy (ECT) documented (MDD)	CPT4
90870	Electroconvulsive therapy (includes necessary monitoring)	CPT4
94.26	Subconvulsive electroshock therapy	ICD9Proc
94.27	Other electroshock therapy	ICD9Proc
GZB	Mental Health, Electroconvulsive Therapy	ICD10PCS
GZB0ZZZ	Electroconvulsive Therapy, Unilateral-Single Seizure	ICD10PCS
GZB1ZZZ	Electroconvulsive Therapy, Unilateral-Multiple Seizure	ICD10PCS
GZB2ZZZ	Electroconvulsive Therapy, Bilateral-Single Seizure	ICD10PCS
GZB3ZZZ	Electroconvulsive Therapy, Bilateral-Multiple Seizure	ICD10PCS
GZB4ZZZ	Other Electroconvulsive Therapy	ICD10PCS

## Sheet: TMS
Code	Name	Class	Vocabulary
90867	Therapeutic repetitive transcranial magnetic stimulation (TMS) treatment; initial, including cortical mapping, motor threshold determination, delivery and management	CPT4	CPT4
90868	Therapeutic repetitive transcranial magnetic stimulation (TMS) treatment; subsequent delivery and management, per session	CPT4	CPT4
90869	Therapeutic repetitive transcranial magnetic stimulation (TMS) treatment; subsequent motor threshold re-determination with delivery and management	CPT4	CPT4

## Sheet: SSRI
Code	Name	Class	Vocabulary
485039	Paroxetine mesylate	Ingredient	RxNorm
664145	Citralopram	Ingredient	RxNorm
2556	citalopram	Ingredient	RxNorm
4493	fluoxetine	Ingredient	RxNorm
42355	fluvoxamine	Ingredient	RxNorm
36437	sertraline	Ingredient	RxNorm
32937	paroxetine	Ingredient	RxNorm
321988	escitalopram	Ingredient	RxNorm

## Sheet: SNRI
Code	Name	Class	Vocabulary
734064	desvenlafaxine	Ingredient	RxNorm
72625	duloxetine	Ingredient	RxNorm
588250	milnacipran	Ingredient	RxNorm
39786	venlafaxine	Ingredient	RxNorm

## Sheet: Tricyclics
Code	Name	Class	Vocabulary
17698	amineptin	Ingredient	RxNorm
704	amitriptyline	Ingredient	RxNorm
722	amoxapine	Ingredient	RxNorm
19895	butriptyline	Ingredient	RxNorm
2597	clomipramine	Ingredient	RxNorm
3247	desipramine	Ingredient	RxNorm
3332	dibenzepin	Ingredient	RxNorm
3634	dothiepin	Ingredient	RxNorm
3638	doxepin	Ingredient	RxNorm
5691	imipramine	Ingredient	RxNorm
5979	iprindole	Ingredient	RxNorm
6465	lofepramine	Ingredient	RxNorm
446248	melitracen	Ingredient	RxNorm
7531	nortriptyline	Ingredient	RxNorm
7674	opipramol	Ingredient	RxNorm
8886	protriptyline	Ingredient	RxNorm
35242	quinupramine	Ingredient	RxNorm
10834	trimipramine	Ingredient	RxNorm

## Sheet: MAOI
Code	Name	Class	Vocabulary
6011	isocarboxazid	Ingredient	RxNorm
7394	nialamide	Ingredient	RxNorm
8123	phenelzine	Ingredient	RxNorm
9639	selegiline	Ingredient	RxNorm
10734	tranylcypromine	Ingredient	RxNorm

## Sheet: Other antidepressants
Code	Name	Class	Vocabulary
42347	bupropion	Ingredient	RxNorm
6646	maprotiline	Ingredient	RxNorm
6929	mianserin	Ingredient	RxNorm
15996	mirtazapine	Ingredient	RxNorm
31565	nefazodone	Ingredient	RxNorm
60842	reboxetine	Ingredient	RxNorm
258326	St. John's wort extract	Ingredient	RxNorm
38252	tianeptine	Ingredient	RxNorm
10737	trazodone	Ingredient	RxNorm
10898	tryptophan	Ingredient	RxNorm
1086769	vilazodone	Ingredient	RxNorm
11196	viloxazine	Ingredient	RxNorm
1455099	vortioxetine	Ingredient	RxNorm

## Sheet: Anxiolytics
Code	Name	Class	Vocabulary
596	alprazolam	Ingredient	RxNorm
1749	bromazepam	Ingredient	RxNorm
1827	buspirone	Ingredient	RxNorm
89812	captodiamine	Ingredient	RxNorm
2356	chlordiazepoxide	Ingredient	RxNorm
21241	clobazam	Ingredient	RxNorm
2353	clorazepate	Ingredient	RxNorm
2622	clotiazepam	Ingredient	RxNorm
21311	cloxazolam	Ingredient	RxNorm
3322	diazepam	Ingredient	RxNorm
24524	ethyl loflazepate	Ingredient	RxNorm
24441	etifoxine	Ingredient	RxNorm
26412	halazepam	Ingredient	RxNorm
5553	hydroxyzine	Ingredient	RxNorm
28181	ketazolam	Ingredient	RxNorm
6470	lorazepam	Ingredient	RxNorm
6680	medazepam	Ingredient	RxNorm
6760	meprobamate	Ingredient	RxNorm
3155	nordazepam	Ingredient	RxNorm
7781	oxazepam	Ingredient	RxNorm
8627	prazepam	Ingredient	RxNorm
38365	tofisopam	Ingredient	RxNorm

## Sheet: hypnotics.sedatives
Code	Name	Class	Vocabulary
516	allobarbital	Ingredient	RxNorm
719	amobarbital	Ingredient	RxNorm
17381	aprobarbital	Ingredient	RxNorm
1325	barbital	Ingredient	RxNorm
19790	brotizolam	Ingredient	RxNorm
477631	butabarbital	Ingredient	RxNorm
19874	butobarbital	Ingredient	RxNorm
19928	butylvinal	Ingredient	RxNorm
2067	carbromal	Ingredient	RxNorm
2372	chlormethiazole	Ingredient	RxNorm
2978	cyclobarbital	Ingredient	RxNorm
48937	dexmedetomidine	Ingredient	RxNorm
22892	dichloralphenazone	Ingredient	RxNorm
4077	estazolam	Ingredient	RxNorm
461016	eszopiclone	Ingredient	RxNorm
4118	ethchlorvynol	Ingredient	RxNorm
4460	flunitrazepam	Ingredient	RxNorm
4501	flurazepam	Ingredient	RxNorm
4903	glutethimide	Ingredient	RxNorm
259421	kava root	Ingredient	RxNorm
28894	lormetazepam	Ingredient	RxNorm
6711	melatonin	Ingredient	RxNorm
6823	methaqualone	Ingredient	RxNorm
6910	methyprylon	Ingredient	RxNorm
6960	midazolam	Ingredient	RxNorm
31722	niaprazine	Ingredient	RxNorm
7440	nitrazepam	Ingredient	RxNorm
7909	paraldehyde	Ingredient	RxNorm
8004	pentobarbital	Ingredient	RxNorm
8770	propiomazine	Ingredient	RxNorm
83885	proxibarbal	Ingredient	RxNorm
35185	quazepam	Ingredient	RxNorm
596205	ramelteon	Ingredient	RxNorm
9601	scopolamine	Ingredient	RxNorm
9624	secobarbital	Ingredient	RxNorm
1547099	suvorexant	Ingredient	RxNorm
89810	talbutal	Ingredient	RxNorm
1490468	tasimelteon	Ingredient	RxNorm
10355	temazepam	Ingredient	RxNorm
38022	theanine	Ingredient	RxNorm
10767	triazolam	Ingredient	RxNorm
38555	triazulenone	Ingredient	RxNorm
38574	trichloroacetaldehyde	Ingredient	RxNorm
38610	triclofos	Ingredient	RxNorm
89811	vinbarbital	Ingredient	RxNorm
74667	zaleplon	Ingredient	RxNorm
39993	zolpidem	Ingredient	RxNorm
40001	zopiclone	Ingredient	RxNorm

## Sheet: Anticonvulsant
Code	Name	Class	Vocabulary
46795	barbexaclone	Ingredient	RxNorm
18846	beclamide	Ingredient	RxNorm
1739745	brivaracetam	Ingredient	RxNorm
2002	carbamazepine	Ingredient	RxNorm
2598	clonazepam	Ingredient	RxNorm
23420	dipropylacetamide	Ingredient	RxNorm
1482502	eslicarbazepine	Ingredient	RxNorm
4135	ethosuximide	Ingredient	RxNorm
4136	ethotoin	Ingredient	RxNorm
1112990	ezogabine	Ingredient	RxNorm
24812	felbamate	Ingredient	RxNorm
72236	fosphenytoin	Ingredient	RxNorm
25480	gabapentin	Ingredient	RxNorm
623400	lacosamide	Ingredient	RxNorm
28439	lamotrigine	Ingredient	RxNorm
114477	levetiracetam	Ingredient	RxNorm
6757	mephenytoin	Ingredient	RxNorm
6758	mephobarbital	Ingredient	RxNorm
6825	metharbital	Ingredient	RxNorm
47858	methsuximide	Ingredient	RxNorm
32624	oxcarbazepine	Ingredient	RxNorm
32894	paramethadione	Ingredient	RxNorm
1356552	perampanel	Ingredient	RxNorm
33253	phenacemide	Ingredient	RxNorm
8134	phenobarbital	Ingredient	RxNorm
33309	phensuximide	Ingredient	RxNorm
8183	phenytoin	Ingredient	RxNorm
187832	pregabalin	Ingredient	RxNorm
8691	primidone	Ingredient	RxNorm
34568	progabide	Ingredient	RxNorm
69036	rufinamide	Ingredient	RxNorm
10240	sulthiame	Ingredient	RxNorm
31914	tiagabine	Ingredient	RxNorm
38404	topiramate	Ingredient	RxNorm
10827	trimethadione	Ingredient	RxNorm
40254	valproate	Ingredient	RxNorm
14851	vigabatrin	Ingredient	RxNorm
39998	zonisamide	Ingredient	RxNorm

[truncated: 3 more sheets: Atypical antipsych, Psychostimulant, Lithium]
